1

1 **Title:** Cold shock as a screen for genes involved in cold acclimatization in *Neurospora crassa*.

2

3 **Authors:** Michael K. Watters, Victor Manzanilla, Holly Howell, Alexander Mehreteab, Erik  
4 Rose, Nicole Walters, Nicholas Seitz, Jacob Nava, Sienna Kekelik, Laura Knuth & Brianna  
5 Scivinsky.

6

7 **Affiliation:** Department of Biology, Valparaiso University, Valparaiso Indiana 46383, USA.

8

9 **ORCID ID for Watters:** 0000-0003-4238-480X

10

11 **Keywords:** Neurospora, cold shock, cold adaptation, morphology, branching

12

### 13 **ABSTRACT**

14 When subjected to rapid drops of temperature (cold shock), *Neurospora* responds with a  
15 dramatic, but temporary shift in its branching pattern. While the cold shock response has been  
16 described morphologically, it has yet to be examined genetically. This project aims to begin the  
17 genetic characterization of the cold shock response and the associated acclimatization to cold  
18 environments. We report here the results of a screen of mutants from the *Neurospora* knockout  
19 library for alterations in their morphological response to cold shock and thus, their ability to  
20 acclimatize to the cold. Three groups of knockouts were selected to be subject to this screen:  
21 genes previously suspected to be involved in hyphal development as well as knockouts resulting  
22 in morphological changes; transcription factors; and genes homologous to *E. coli* genes known to  
23 alter their expression in response to cold shock. Several strains were identified with altered  
24 responses. The genes impacted in these mutants are listed and discussed. A significant  
25 percentage (81%) of the knockouts of genes homologous to those previously identified in *E. coli*  
26 showed altered cold shock responses in *Neurospora* – suggesting that the response in these two  
27 organisms is largely shared in common.

28

29

30

1 The environmental conditions that life must contend with can vary widely. Organisms have  
2 evolved a wide range of mechanisms for contending with these changing conditions. For the  
3 filamentous fungus *Neurospora*, growth continues through nearly the entire range of  
4 temperatures (above freezing) that is observed in this environment. Although the rate of tip  
5 extension varies linearly with temperature (Watters et al 2000), the branch density (the statistical  
6 distribution of distances between branch sites along a linear growing hypha) remains constant  
7 across this range (Watters *et al.* 2000) allowing the fungus to continue to infiltrate its  
8 environment at the same density. Temperatures progressing through this range would be  
9 expected to have dramatic impacts on enzyme activity generally (and thus overall metabolism),  
10 but also directly on features critical to growth such as membrane fluidity, DNA/RNA stability  
11 and the rates of transcription and translation.

12

### 13 **Response to cold shock**

14 When the apparent independence of branching and temperature is tested by rapid temperature  
15 shifts, a 3-phase response is observed (Figure 1, Watters *et al.* 2000, Watters 2013). The initial  
16 response to cold shock is the growth of a single longer than normal unbranched segment. This  
17 was termed the “Lag” phase of the response. This phase is followed by a series of closely spaced  
18 apical branch points, termed the “Apical” phase. Apical branch formation has been previously  
19 associated with the disruption and attempted reorganization of the normal tip-growth apparatus  
20 (Reynaga-Peña *et al.* 1995, Riquelme & Bartnicki-Garcia 2004), a mechanism distinct from that  
21 thought to be involved in lateral branching. Finally, with continued incubation at the lower  
22 temperature, the colony returns to lateral branching, termed the “Recovery” phase. Growth in  
23 this phase of the response resembles that which would be seen had the colony been grown at 4°C  
24 continuously. The same density is observed for growth subjected to constant incubation at 4°C  
25 (or any other fixed temperature) as well (Watters et al 2000). Thus, the cold shock response  
26 appears to be a temporary disturbance to a homeostatic system which maintains branch density at  
27 a constant, evolutionarily favored, value.

28

29 Thus, *Neurospora* appears to incorporate a system which has the effect of maintaining  
30 homeostasis for critical cellular characteristics. At least one impact of this system is that branch  
31 density is maintained at widely different temperatures. The morphological effects of cold shock  
32 are the indirect consequence of this system’s staged process of adjusting cellular conditions in  
33 order to compensate for the new growth temperature.

34

### 35 **Cold shock response of bacteria**

36 Homeostasis in the face of temperature changes and more specifically the response to cold  
37 shock has been extensively studied in bacterial systems for over 20 years. The effect of cold  
38 shock is manifest in multiple cellular systems including: membrane rigidity (Shivaji & Prakash  
39 2010), stability of secondary structures in DNA/RNA (Phadtare 2004), efficiency of protein  
40 folding (Phadtare 2004) and ribosome function (Gualerzi *et al.* 2011). While much remains to be  
41 described in these systems, cold shock appears to result in a multi-stage response (Phadtare  
42 2004). First, a lag period in which growth and translation of proteins generally cease. This is  
43 followed by an adjustment phase in which specific cold-shock proteins which compensate for the  
44 changes brought on by the cold are preferentially translated (Giuliodori *et al.* 2004). In the final  
45 stage, growth continues otherwise normally, but at a reduced rate. DNA microarray transcription  
46 profiling of the cold shock response in *E. coli* by Phadtare and Inouye (2004) has shown that

1 several hundred genes respond to cold shock, either being transiently induced/repressed or  
2 showing prolonged induction/repression. Analogous responses to cold shock and/or cold  
3 acclimation have been observed in diverse organisms including plants (Guy 1999) and animals  
4 (Canclini & Esteves 2007). Attempts to uncover cold shock proteins in fungi (Fang & Leger  
5 2010) have met with mixed success.

## 7 **Connections between cold shock in bacteria and Neurospora**

8 It is tempting to draw parallels between what is known about cold shock in bacterial systems  
9 and the observed response of *Neurospora* to similar cold shocks. Many of the systems affected  
10 during bacterial cold shock would be expected to impact fungal tip growth and branching (most  
11 obviously, membrane fluidity). Beyond that however, the nature and timing of the two responses  
12 are similar. Both responses can be adjusted by changing the intensity of the cold shock with  
13 more mild shocks (lower temperature differences) producing more mild responses and more  
14 severe shocks (larger temperature differences) producing more severe responses. Furthermore,  
15 the dynamics of the responses parallel each other. In each, there is a multistage response. There  
16 is an initial response which is transient in nature, followed by a more long-term response which  
17 largely represents a return to normal growth.

## 19 **Guiding Hypotheses**

20 The hypothesis of this project was that the observed cold shock response of *Neurospora* is a  
21 consequence of a cellular response homologous to that induced by cold shock in bacteria. Under  
22 this hypothesis, the observed, transient morphological changes are an aspect of the primary  
23 response which is that of the fungal cell adjusting itself to growth in the cold via a manner which  
24 is shared in common with simpler organisms. This hypothesis was tested by screening  
25 *Neurospora* knockout strains impacting genes homologous to those identified in *E. coli* which  
26 alter their expression patterns in response to cold shock. Of 68 knockouts screened, 55 (81%)  
27 showed changes in the morphological response to cold shock, suggesting a strong connection  
28 between the responses of *E. coli* and *Neurospora* to cold shock.

30 Additionally, *Neurospora* strains with knockouts of known transcription factors, genes  
31 impacting morphology, or genes homologous to those in yeast known to affect polar growth  
32 were similarly screened. In this screen, of 357 knockouts examined, 69 (19%) showed changes  
33 in the response to cold shock. Together, these screens provide the first molecular underpinning  
34 to the cold shock response in *Neurospora*,

## 36 **MATERIALS AND METHODS**

### 37 **The *Neurospora* targeted deletion collection**

38 As part of the *Neurospora* Genome Project, a collection of strains containing disruptions in  
39 presumptive genes has been constructed (Colot *et al.* 2006). Strains representing deletions of  
40 most of the genes of the *Neurospora* genome are available from the Fungal Genetics Stock  
41 Center (McCluskey 2003). As each deletion strain has been altered in a single, previously  
42 identified, presumptive gene – going from phenotype to sequence is greatly simplified.

44 The accession numbers listed in Table 1 represent the locus number of the gene subject to  
45 inactivation in the knockout strain under test. Every annotated gene in *Neurospora crassa* has  
46 been assigned a locus number of the form NCU#####. The functions reported (Tables 1 – 3) are

1 those associated with the genes as annotated on the FungiDB database as of July 2017:  
2 [fungidb.org/fungidb/](http://fungidb.org/fungidb/). The reported functions are based solely on the annotations currently  
3 associated with those strains and have not been independently confirmed by the authors of this  
4 study. The genes identified in this study have been annotated on FungiDB to reflect these results.  
5  
6

### 7 **Selection of knockout strains to screen**

8 A screen of the entire library was determined to be impractical. We instead screened an  
9 abbreviated subsection of the library chosen to be more likely to yield positive responses.  
10

11 First, knockouts of genes homologous to those which show altered transcription in *E. coli*  
12 subjected to cold shock. The protein sequences of *E. coli* genes identified by (Phadtare and  
13 Inouye 2004) were retrieved from the *E. coli* database ([ecocyc.org/](http://ecocyc.org/)). These amino acid  
14 sequences were then fed into a BLAST search on the NIH NCBI site  
15 ([blast.ncbi.nlm.nih.gov/Blast.cgi](http://blast.ncbi.nlm.nih.gov/Blast.cgi)) with the output limited to *Neurospora* sequences in order to  
16 identify their nearest *Neurospora* homologs. These homologs were then searched on FungiDB to  
17 determine which had knockout strains available. From this final list, 68 were selected randomly  
18 for screening in this study. This set was selected to determine the degree of relationship between  
19 the cold shock response in *E. coli* and *Neurospora*.  
20

21 Second, two sets of knockouts from the library (hyphal growth and morphological) were  
22 included in this screen. One plate (identified as “plate 29 – morphologicals” by the FGSC)  
23 contained 71 strains with knockouts known to cause morphological changes. The second plate  
24 (identified as “Hyphal Growth Set” by the FGSC) contained 78 strains with knockouts in genes  
25 homologous to genes in yeast known to affect polar growth.  
26

27 Lastly, knockouts of known transcription factors in *Neurospora* were selected for cold shock  
28 screening. This collection is available as a set from the Fungal Genetics Stock Center  
29 (McCluskey 2003). It was selected for this screen to determine which transcription factors play a  
30 role in signaling to the cell that cold adaptation genes must be activated.  
31

### 32 **Media**

33 Media and culturing procedures were those described in Davis & deSerres (1970). Growth  
34 described as being on “minimal” was on Vogel’s minimal medium (Davis & deSerres 1970).  
35

### 36 **Screen**

37 The selected knockout strains were subjected to a screen looking for altered responses to cold  
38 shock. Wild-type *Neurospora* progresses through a three-stage response following a shift into  
39 the cold. As detailed above, these are the Lag, Apical and Recovery phases. As the cold shock  
40 response is known to be stronger following more dramatic temperature shifts (Watters et al.  
41 2000) we initially grew strains at 33°C and shifted to 4°C. Strains were inoculated onto Vogel’s  
42 Minimal Medium and incubated overnight at 33°C. The next morning plates were moved to  
43 4°C. After an overnight incubation at 4°C, the strain’s response to cold shock was photographed  
44 and evaluated. Variations in the cold shock response from that of wild-type *Neurospora* were  
45 judged qualitatively and based primarily on the morphology of the “apical” phase of branching.  
46

## 1 **Photomicroscopy**

2 Growing cultures were examined and photographed using a Motic 10MP digital camera  
3 attached to a Wolfe Beta Elite trinocular microscope. Photographs were taken of well separated,  
4 leading hyphae.

5  
6

## 7 **RESULTS AND DISCUSSION**

8 During the initial study of the cold shock response in *Neurospora* (Watters et al 2000) it was  
9 observed that several classical morphological mutants (most notably “granular” and “delicate”  
10 produced altered responses to cold shock, demonstrating that mutants could be obtained which  
11 influenced this process. We chose to screen mutants from the *Neurospora* knockout library for  
12 their cold shock response in order to provide a genetic grounding to this process which has, thus  
13 far, been lacking. We chose to use the mutants of the knockout library instead of the products of  
14 a random mutagenesis as the knockouts allow an immediate identification of gene function in  
15 most cases.

16

17 Knockout strains displaying an altered morphological response to cold shock were classified  
18 according to the specific variation they displayed. Examples are shown in Figure 2. The “burst”  
19 phenotype was defined as displaying a large number of growing tips which stop growing, swell  
20 and then structurally fail leaving a pool of cytoplasm at the tip. The “fail” phenotype was  
21 defined as failing to display the apical branch phase characteristic of cold shock. In the “fail”  
22 response, growth proceeds normally with lateral branching following cold shock. The “thin”  
23 phenotype was defined by a very rapid decrease in hyphal diameter following cold shock. It was  
24 common to observe “thin” in combination with other altered cold shock responses. The “dense”  
25 phenotype was defined by displaying apical branching with visibly shorter distances between  
26 branch points following cold shock relative to the response in wild-type. The “weak” phenotype  
27 was defined as the opposite – an apical branch phase with visibly longer distances between  
28 branch points relative to wild-type following cold shock. Finally, the “cot-like” phenotype was  
29 characterized by a lack of apical branching, but a shift to tightly spaced lateral branches which  
30 morphologically resembled the growth of the traditional *cot* mutants at the restrictive  
31 temperature.

32

33 We can imagine two distinct groups of genes to be identified by these screens. The first  
34 would be genes directly involved in cold adaptation which are responsible for altering the cell to  
35 accommodate the altered environment. This first group of functions, we could very well expect  
36 to be generalized to a wide variety of organisms. The second would be genes coding for proteins  
37 which are individually temperature sensitive and compensate for temperature changes by either  
38 altering regulation to compensate for the change in activity or shifting activity to a paralog which  
39 functions better at the new temperature. This second group we might expect to be more species  
40 specific.

41

## 42 **Screen of *E. coli* cold shock gene homolog knockouts**

43 A total of 68 *Neurospora* strains with knockouts of genes homologous to *E. coli* genes which  
44 alter transcription in response to cold shock (Phadtare and Inouye 2004) were screened. A total  
45 of 55 (81%) showed altered morphology to cold shock (Table 1). The knockouts displaying  
46 altered response to cold shock represent a variety of cellular functions. There does not to be any

1 correspondence between the response of a gene in E. coli (up regulated, down regulated, transient  
2 or sustained), or its function (membrane metabolism, ROS control etc) (Phadtare and Inouye  
3 2004) and the morphology displayed during cold shock.

4  
5 The screen of cold shock orthologs provides a test of the hypothesis that the cold shock  
6 response in both E. coli and Neurospora share a great deal of their cold shock response in  
7 common. The very high percentage of overlap between genes playing a role in these two widely  
8 separated organisms argues that the two responses are functionally related to a large degree. The  
9 large fraction of overlap also argues that the majority of the genes identified in these two  
10 organisms are involved generally in cold adaptation. The results also suggest that screening for  
11 deviations from the normal cold shock response morphology is an effective tool for detecting  
12 genes important in cold adaptation.

13  
14 No correlation was observed between the transcription change observed in E. coli (Phadtare  
15 and Inouye 2004) and the observed cold shock phenotype observed in the knockout strain of its  
16 Neurospora ortholog. Similarly, no correlation was observed between the cold shock phenotype  
17 observed and the annotated function of the genes affected in these strains.

### 18 19 **Screen of Morphological/Hyphal plates**

20 A total of 149 selected mutant strains from the Neurospora knockout library were previously  
21 segregated into two collections. The “Morphological” collection resulted in known  
22 morphological variations in the knockout strains. The “Hyphal” collection consisted of  
23 knockouts of genes previously suspected to play a role in hyphal growth. These two collections  
24 were screened for alterations to their response to cold shock. In total, 35 (23%) strains were  
25 identified (Table 2) that displayed variant cold shock responses. The altered responses fell into  
26 several phenotypic categories. The genes impacted in each knockout strain are identified in  
27 Table 2.

28  
29 As with the E. coli orthologs, the genes identified from this collection which displayed  
30 altered response to cold shock appear to be involved in a number of different cellular functions.  
31 In this case they include lipid/membrane metabolism, protein degradation/turnover, gene  
32 regulation, protein regulation, and reactive oxygen control.

33  
34 The morphological/hyphal knockouts were previously screened for temperature-dependent  
35 branch density (Watters et al. 2011). Comparing the strains identified above with alterations to  
36 their cold shock response to those previously determined to show temperature-dependent  
37 branching we find only a modest overlap with the following strains showing altered phenotypes  
38 in both: NCU02333, NCU00830, NCU04242, NCU02114, NCU04264, and NCU03076.  
39 Examining the overlap statistically via Chi-square (calculations not shown) yields a p value  
40 greater than 0.9, strongly suggesting that the overlap is random. This suggests that these two  
41 screens (cold shock vs temperature sensitive branching during steady-state growth) are  
42 independent. This leads us to conclude that the cold shock response and temperature-dependent  
43 branching are independent aspects of cold adaptation, highlighting the different genes involved  
44 in short-term adaptation to the cold as opposed to those required for sustained growth in cold  
45 environments. Additional screens of the knockout library for strains displaying growth rate

1 dependent branching, and comparing them to those with an altered cold shock response will  
2 allow us to further examine the apparent independence of these two morphological screens.

3

#### 4 **Screen of transcription factor knockouts**

5 A total of 208 *Neurospora* strains with knockouts in genes which function as transcription  
6 factors were screened for their response to cold shock. In all, 34 (16%) showed altered  
7 morphology to cold shock (Table 3).

8

9 The transcription factor screen identifies a number of genes which may function in a broad  
10 way to regulate multiple genes to the purpose of cold adaptation.

11

12 As with the knockouts of orthologs of *E. coli* cold shock responding genes, the mutant strains  
13 identified in the additional screens show no observed correlations between the phenotypes  
14 observed and the annotated functions of the genes with a variety of functions being associated  
15 with the observed cold shock variations.

16

17 In conclusion, the gene functions highlighted by these screens (Table 1-3) are diverse. It is  
18 unclear how the diverse gene network, partially exposed here, coordinates for the function of  
19 temperature acclimatization. The results presented here demonstrate a strong relationship  
20 between the cold shock responses of *E. coli* and *Neurospora crassa*. The phenotype under  
21 examination here (morphological response to cold shock) appears to be influenced by a diverse  
22 network of genes. Similar diversity of function has been observed in other examinations of  
23 morphogenesis in *Neurospora* (Seiler & Plamann 2003). Further work on cold acclimatization,  
24 including a broad survey of the full *Neurospora* knockout library should help clarify these  
25 connections.

26

#### 27 **ACKNOWLEDGEMENTS**

28 This work was supported by a grant from the Indiana Space Grant Consortium (INSGC). We  
29 would also like to thank Kevin McCluskey and everyone at the Fungal Genetics Stock Center for  
30 supplying the knockout strains and their diligent work in support of the fungal genetics  
31 community over the years.

32

33

1 **Table 1: Results of screening 68 knockouts selected as orthologs of genes known to alter**  
 2 **expression in response to cold shock in E coli:**  
 3

| <u>NCU#</u> | <u>Phenotype</u> | <u>Gene ID</u>                                   | <u>Gene symbol</u> |
|-------------|------------------|--------------------------------------------------|--------------------|
| NCU01213    | burst            | superoxide dismutase-2                           | sod-2              |
| NCU01782    | burst            | Ras guanyl-nucleotide exchange factor<br>RasGEF  |                    |
| NCU05410    | dense            | arginine-5                                       | arg-5              |
| NCU04899    | dense            | tricarboxylic acid-15                            | tca-15             |
| NCU09120    | fail             | lysine-specific histone demethylase Aof2         |                    |
| NCU00528    | fail             | hyphal anastomosis-4                             | ham-4              |
| NCU03415    | fail             | aldehyde dehydrogenase                           | CBS-3              |
| NCU09975    | fail             | multidrug resistance protein 3                   |                    |
| NCU05927    | fail             | GTP-binding protein GUF1                         | GTP-7              |
| NCU07832    | fail             | pre-mRNA processing splicing factor 8            | msh-39             |
| NCU00056    | fail             | condensing enzyme with mitochondrial<br>function | cem-1              |
| NCU10008    | fail             | tricarboxylic acid-14                            | tca-14             |
| NCU01004    | fail             | phosphatidylserine decarboxylase<br>proenzyme    | CHOL-15            |
| NCU11289    | fail             | aldo-keto reductase                              |                    |
| NCU05770    | thin             | catalase-2                                       | cat-2              |
| NCU04140    | thin             | FK506 resistant-2                                | fkr-2              |
| NCU02556    | thin             | histone acetyl transferase-2                     | hat-2              |
| NCU02630    | thin             | heat shock protein 78                            | hsp78              |
| NCU02055    | thin             | uridine nucleosidase Urh1                        | NUS-1              |
| NCU05151    | thin             | phosphoketolase                                  | PHK-1              |
| NCU06005    | thin             | glycerol kinase                                  | GLK-1              |
| NCU05606    | thin             | glucosidase 2 subunit beta                       | GHX-4              |
| NCU09767    | thin             | membrane transporter                             |                    |
| NCU04791    | thin             | menadione-induced gene-10                        | mig-10             |
| NCU06342    | thin             | phospholipase D                                  | PLA-5              |
| NCU07156    | thin             | histidine-6                                      | his-6              |
| NCU09930    | thin             | folic acid synthesis protein                     | fol-9              |
| NCU08968    | thin             | dimethyladenosine transferase                    |                    |



| <b><u>NCU#</u></b> | <b><u>Phenotype</u></b> | <b><u>Gene ID</u></b>                       | <b><u>Gene symbol</u></b> |
|--------------------|-------------------------|---------------------------------------------|---------------------------|
| NCU01744           | thin                    | enhancer-2 of am                            | en(am)-2                  |
| NCU01772           | thin                    | DNA-directed RNA polymerase III polypeptide | rpo-10                    |
| NCU01528           | thin                    | glyceraldehyde-3-phosphate dehydrogenase-1  | gpd-1                     |
| NCU08216           | thin                    | cystathionine beta-synthase                 | MET-11                    |
| NCU06659           | thin&fail               | GTP-binding protein                         | GTP-3                     |
| NCU10760           | thin&fail               | jumonji domain-containing protein 5         |                           |
| NCU07732           | thin&fail               | arginine-2                                  | arg-2                     |
| NCU08693           | thin&fail               | heat shock protein 70-5                     | hsp70-5                   |
| NCU08858           | thin&fail               | MFS alpha-glucoside transporter             | SUT-1                     |
| NCU00793           | thin&fail               | trehalose phosphate synthase                | GT20-2                    |
| NCU00771           | thin&fail               | UBX domain-containing protein 7             |                           |
| NCU04117           | thin&fail               | ATP-dependent permease MDL2                 | ABC-7                     |
| NCU08336           | thin&fail               | tricarboxylic acid-12                       | tca-12                    |
| NCU04583           | weak                    | acetyltransferase                           |                           |
| NCU06017           | weak                    | thiosulfate sulfurtransferase               | TST-1                     |
| NCU01589           | weak                    | heat shock protein 60                       | hsp60                     |
| NCU08439           | weak                    | leptomycin B resistance protein pmd1        | ABC-2                     |
| NCU01625           | weak                    | DNA repair helicase RAD3                    | DNR-10                    |
| NCU04303           | weak                    | asparagine synthetase 2                     | asn-1                     |
| NCU04339           | weak                    | ribokinase                                  | RIK-8                     |
| NCU00919           | weak                    | ATP-dependent RNA helicase rok-1            | drh-16                    |
| NCU00565           | weak                    | lipoic acid synthetase                      | LIA-1                     |
| NCU07027           | weak                    | glycogen phosphorylase                      | GYP-1                     |
| NCU10053           | weak                    | thymidylate synthase                        | pyr-8                     |
| NCU00567           | weak                    | arginine-6                                  | arg-6                     |
| NCU06523           | weak                    | glycosylhydrolase family 13-4               | gh13-4                    |
| NCU08933           | weak                    | cellular nucleic acid-binding protein       |                           |

1  
2  
3  
4  
5

1 **Table 2: Results of screening 148 knockouts on the “morphological” and “hyphal growth”**  
 2 **plates:**  
 3

| <b>NCU #</b> | <b>phenotype</b> | <b>Gene ID</b>                                                                  | <b>symbol</b> |
|--------------|------------------|---------------------------------------------------------------------------------|---------------|
| NCU02133.2   | burst            | superoxide dismutase-1                                                          | sod-1         |
| NCU03623.2   | burst            | ubiquitin-conjugating enzyme E                                                  |               |
| NCU03938.2   | burst            | alternative oxidase-5                                                           | aod-5         |
| NCU04242.2   | burst/dense      | period-6                                                                        | prd-6         |
| NCU07728.2   | burst/thin       | siderophore regulation                                                          | sre           |
| NCU02333.2   | thin             | arginase-1                                                                      | aga-1         |
| NCU02542.2   | thin             | embden-meyerhof pathway-1                                                       | emp-1         |
| NCU03013.2   | thin             | anchored cell wall protein-10                                                   | acw-10        |
| NCU04264.2   | thin             | extracellular developmental signal biosynthesis protein FluG                    |               |
| NCU05591.2   | thin             | ABC transporter CDR4                                                            |               |
| NCU07075.2   | thin             | calcium exchanger                                                               | cax           |
| NCU00830.2   | thin             | ctr copper transporter                                                          | tcu-1         |
| NCU01613.2   | thin             | protoperithecia-2                                                               | pp-2          |
| NCU03076.2   | thin             | delta-1-pyrroline-5-carboxylate dehydrogenase                                   |               |
| NCU04669.2   | thin             | hypothetical protein homologous to Bactericidal permeability-increasing protein |               |
| NCU03184.2   | thin             | C2H2 conidiation transcription factor FlbC                                      |               |
| NCU02260.2   | thin             | regulatory particle, ATPase-like-3                                              | rpt-3         |
| NCU05295.2   | thin             | proteasome catalytic alpha-5                                                    | pca-5         |
| NCU09366.2   | thin             | proteasome catalytic beta-6                                                     | pcb-6         |
| NCU02636.2   | failure          | peroxin 4                                                                       | pex4          |
| NCU09830.2   | failure          | menadione-induced gene-12                                                       | mig-12        |
| NCU00467.2   | failure          | COP9 signalosome-5                                                              | csn-5         |
| NCU03314.2   | failure          | mob2-like-a                                                                     | mob-2a        |
| NCU03901.2   | cot-like         | peroxin 14                                                                      | pex14         |
| NCU09842.2   | failure          | mitogen activated protein kinase-1                                              | mak-1         |
| NCU03277.2   | failure          | peroxin 10                                                                      | pex10         |
| NCU06205.2   | failure          | regulator of conidiation-1                                                      | rco-1         |
| NCU06145.2   | failure          | RING-6                                                                          | RING-6        |
| NCU07947.2   | failure          | glycolipid transfer protein HET-C2                                              |               |
| NCU01408.2   | weak             | COP9 signalosome-3                                                              | csn-3         |
| NCU03894.2   | weak             | serine/threonine protein kinase-4                                               | stk-4         |
| NCU07617.2   | dense            | aconidiate-3                                                                    | acon-3        |
| NCU02114.2   | dense            | G1/S-specific cyclin Cln1                                                       |               |

1 **Table 3: Results of screening 208 knockouts of Neurospora transcription factors:**

2

| NCU#     | Phenotype   | Gene ID                                          | Gene symbol |
|----------|-------------|--------------------------------------------------|-------------|
| NCU05051 | thin        | COL-23                                           | col-23      |
| NCU01629 | thin        | hypothetical protein                             |             |
| NCU04561 | thin        | melanization defective-1                         | mld-1       |
| NCU05909 | weak        | hypothetical protein                             |             |
| NCU00499 | weak        | all development altered-1                        | ada-1       |
| NCU07945 | weak        | fungal specific transcription factor             | tah-4       |
| NCU08658 | weak        | zinc finger transcription factor-50              | znf-50      |
| NCU02017 | fail        | CBF/NF-Y family transcription factor             | ada-2       |
| NCU00097 | fail        | BEAK-1                                           | bek-1       |
| NCU07561 | fail        | hypothetical protein                             |             |
| NCU00499 | fail        | all development altered-1                        | ada-1       |
| NCU02173 | fail        | zinc finger transcription factor-52              | znf-52      |
| NCU02356 | fail        | white collar 1                                   | wc-1        |
| NCU08294 | fail        | nitrogen assimilation transcription factor nit-4 | nit-4       |
| NCU08294 | fail        | nitrogen assimilation transcription factor nit-4 | nit-4       |
| NCU06990 | fail        | hypothetical protein                             |             |
| NCU07788 | fail        | fungal specific transcription factor             | col-26      |
| NCU06028 | fail        | quinic acid utilization activator                | qa-1F       |
| NCU07945 | fail        | fungal specific transcription factor             | tah-4       |
| NCU06068 | fail        | fungal specific transcription factor             | col-25      |
| NCU02214 | fail        | TAH-2                                            | tah-2       |
| NCU03070 | burst       | hypothetical protein                             |             |
| NCU03962 | dense       | hypothetical protein                             |             |
| NCU03356 | dense       | hypothetical protein                             |             |
| NCU03905 | dense       | hypothetical protein                             |             |
| NCU01154 | dense       | submerged protoperithecia-1                      | sub-1       |
| NCU00144 | dense       | hypothetical protein                             |             |
| NCU03417 | dense       | hypothetical protein                             |             |
| NCU06990 | dense       | hypothetical protein                             |             |
| NCU03120 | dense       | hypothetical protein                             |             |
| NCU08000 | thin & fail | cutinase transcription factor 1 alpha            | far1        |
| NCU08651 | thin & fail | zinc binuclear cluster-type protein              | col-27      |
| NCU05536 | thin & fail | hypothetical protein                             |             |
| NCU07705 | thin & fail | C6 finger domain-containing protein              | clr-1       |

3

4

5

12

1 Figure 1: Cold shock response in wild-type *Neurospora*:

2

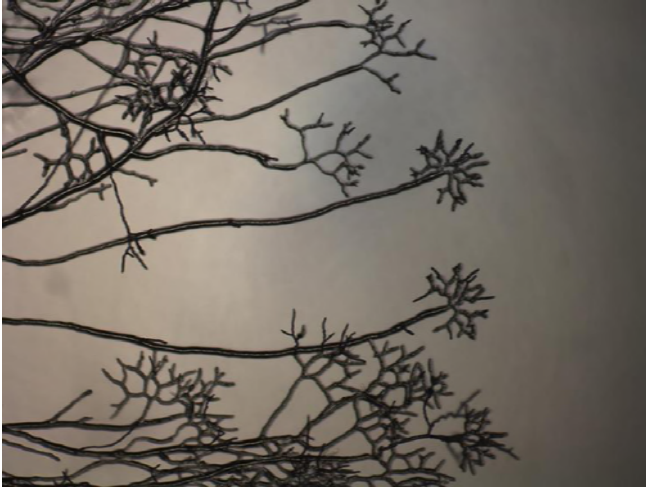

3

4

5

6

7

8

- 1 Figure 2: Alternate cold shock morphologies displayed:
- 2 Bursting tips, failure to cold shock, shift to thin hypha, extra dense apical branching, cot-like,
- 3 weaker than normal apical branching
- 4
- 5

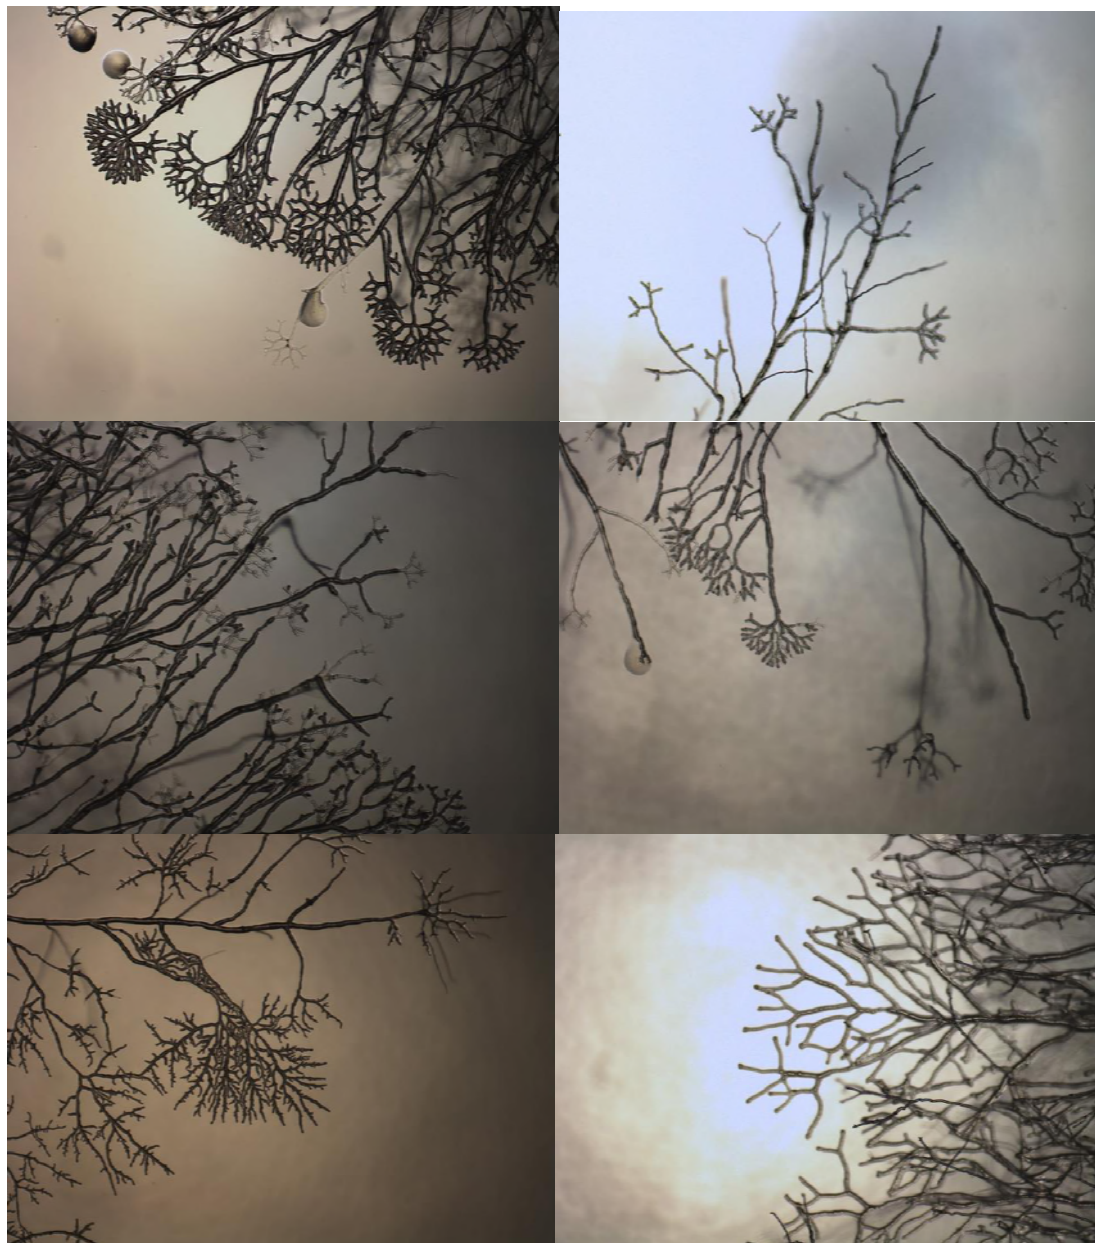

- 1 References:  
2  
3 Canclini, L. and A. Esteves, 2007 Preliminary analysis of cold stress responsive proteins in  
4 *Mesocestoides corti* larvae. 116:314-319.
- 5 Colot H. V., G. Park, G. E. Turner, C. Ringelberg, C. Crew, L. Lintvinkova, R. L. Weiss, K. A.  
6 Borkovich, J. C. Dunlap, 2006 A high-throughput gene knockout procedure for *Neurospora*  
7 reveals functions for multiple transcription factors. Proc. Natl. Acad. Sci. USA 103:10352–  
8 10357.
- 9 Davis, R.H. & F.J. deSerres, 1970 Genetic and microbiological research techniques for  
10 *Neurospora crassa*. Methods in Enzymology 17:79-143.
- 11 Fang, W. and R. J. St Leger, 2010 RNA binding proteins mediate the ability of a fungus to adapt  
12 to the cold. Environmental Microbiology 12(3):810-20.
- 13 Giuliadori, A. M., A. Brandi, C. O. Gualerzi and C. L. Pon, 2004 Preferential translation of  
14 cold-shock mRNAs during cold adaptation. RNA 10:265-276.
- 15 Gualerzi, C. O., A. M. Giuliadori, A. Brandi, F. Di Pietro, L. Piersimoni, A. Fabbretti and C. L.  
16 Pon, 2011 Translation initiation at the root of the cold-shock translational bias. p. 143-154.  
17 In M. V. Rodina, W. Wintermeyer and R. Green (Ed.) Ribosomes. Springer-Verlag, Vienna.
- 18 Guy, C., 1999 Molecular Responses of Plants to Cold Shock and Cold Acclimation. Journal of  
19 Molecular Microbiology and Biotechnology 1(2):231-242.
- 20 McCluskey K., 2003 The fungal genetics stock center: from molds to molecules. Advances in  
21 Applied Microbiology 52:245-262.
- 22 Phadtare, S., 2004 Recent Developments in Bacterial Cold-Shock Response. Current Issues in  
23 Molecular Biology. 6:125-136.
- 24 Phadtare, S. and M. Inouye, 2004 Genome-Wide Transcriptional Analysis of the Cold Shock  
25 Response in Wild-Type and Cold-Sensitive, Quadruple-*csp*-Deletion Strains of *Escherichia*  
26 *coli*. Journal of Bacteriology 186:7007-7014.
- 27 Reynaga-Peña, C. G., Bracker, C. E. and S. Bartnicki-Garcia, 1995 Cytoplasmic contractions,  
28 Spitzenkörper behavior and apical branching in *Aspergillus niger*. In: Ann. Meet. Mycol.  
29 Soc. America, San Diego, CA. Inoculum 46: p. 34.
- 30 Riquelme M. & S. Bartnicki-Garcia, 2004 Key differences between lateral and apical branching  
31 in hyphae of *Neurospora crassa*. Fungal Genetics and Biology 41:842-851.
- 32 Seiler, S. & M. Plamann, 2003 The Genetic Basis of Cellular Morphogenesis in the Filamentous  
33 Fungus *Neurospora crassa*. 14:4352-4364.
- 34 Shivaji, S. and J. S. S. Prakash, 2010 How do bacteria sense and respond to low temperature.  
35 Archives of Microbiology 192:85-95.

- 1 Watters, M. K., C. Humphries, I. deVries, and A. J. F. Griffiths, 2000 A homeostatic set point  
2 for branching in *Neurospora crassa*. *Mycological Research* 104:557-563.
- 3 Watters, M. K., M. Boersma, M. Johnson, C. Reyes, E. Westrick & E. Lindamood, 2011 A  
4 screen for *Neurospora* knockout mutants displaying growth rate dependent branch density.  
5 *Fungal Biology*. 115: 296-301.
- 6 Watters, M. K., 2013 Control of Branching in *Neurospora crassa*. In *Neurospora Genomics and*  
7 *Molecular Biology*, Durgadas P. Kasbekar & Kevin McCluskey eds. (Norfolk, U.K., Caister  
8 Academic Press), pp. 23 – 44.
- 9

1 **Title:** Cold shock as a screen for genes involved in cold acclimatization in *Neurospora crassa*.

2  
3 **Authors:** Michael K. Watters, Victor Manzanilla, Holly Howell, Alexander Mehreteab, Erik Rose, Nicole Walters,  
4 Nicholas Seitz, Jacob Nava, Sienna Kekelik, Laura Knuth & Brianna Scivinsky.

5  
6 **Affiliation:** Department of Biology, Valparaiso University, Valparaiso Indiana 46383, USA.

7  
8 **ORCID ID for Watters:** 0000-0003-4238-480X

9  
10 **Keywords:** Neurospora, cold shock, cold adaptation, morphology, branching

11  
12 **ABSTRACT**

13 When subjected to rapid drops of temperature (cold shock), *Neurospora* responds with a temporary shift in its  
14 morphology. This report is the first to examine this response genetically. We report here the results of a screen of  
15 selected mutants from the *Neurospora* knockout library for alterations in their morphological response to cold shock and  
16 thus, their ability to acclimatize to the cold. Three groups of knockouts were selected to be subject to this screen: genes  
17 previously suspected to be involved in hyphal development as well as knockouts resulting in morphological changes;  
18 transcription factors; and genes homologous to *E. coli* genes known to alter their expression in response to cold shock. A  
19 total of 115 strains were identified with altered responses. We report here the cold shock morphologies and GO  
20 categorizations of strains subjected to this screen. Of strains with knockouts in genes associated with hyphal growth or  
21 morphology, 30 of 129 tested (23%) showed an altered response to cold shock. Of strains with knockouts in transcription  
22 factor genes, 30 of 147 (20%) showed an altered response to cold shock. Of strains with knockouts in genes homologous  
23 to *E. coli* genes which display altered levels of transcription in response to cold shock, a total of 55 of 68 tested (81%)  
24 showed an altered cold shock response. This suggests that the response to cold shock in these two organisms is largely  
25 shared in common.

26  
27  
28



## 1 **Introduction**

2 The environmental conditions that life must contend with can vary widely. Organisms have evolved a wide range of  
3 mechanisms for contending with these changing conditions. For the filamentous fungus *Neurospora*, growth continues  
4 through nearly the entire range of temperatures (above freezing) that is observed in this environment. Although the rate  
5 of tip extension varies linearly with temperature (Watters et al 2000), the branch density (the statistical distribution of  
6 distances between branch sites along a linear growing hypha) remains constant across this range (Watters *et al.* 2000)  
7 allowing the fungus to continue to infiltrate its environment at the same density. Temperatures progressing through this  
8 range would be expected to have dramatic impacts on enzyme activity generally (and thus overall metabolism), but also  
9 directly on features critical to growth such as membrane fluidity, DNA/RNA stability and the rates of transcription and  
10 translation.

11  
12 In both *Neurospora* and *E. coli*, there is a multistage response to cold shock. There is an initial response which is  
13 transient in nature, followed by a more long-term response which largely represents a return to normal growth.  
14 *Neurospora* grows via extension at a hyphal tip with periodic branching which is typically lateral (Figure 1A). However,  
15 when *Neurospora* is subjected to cold shock, a multi-phase morphological response is observed (Figure 1B, Watters *et al.*  
16 2000, Watters 2013). The morphological effects of cold shock are the indirect consequence of this system's staged  
17 process of adjusting cellular conditions in order to compensate for the new growth temperature.

18  
19 Homeostasis in the face of temperature changes and more specifically the response to cold shock has been  
20 extensively studied in bacterial systems for over 20 years. DNA microarray transcription profiling of the cold shock  
21 response in *E. coli* by Phadtare and Inouye (2004) identified a collection of genes which alter their level of transcription  
22 in response to cold shock.

23  
24 The hypothesis of this project was that the observed cold shock response of *Neurospora* is a consequence of a cellular  
25 response homologous to that induced by cold shock in bacteria. Under this hypothesis, the observed, transient  
26 morphological changes are a consequence of the fungal cell adjusting itself to growth in the cold via a manner which is  
27 shared in common with simpler organisms. This hypothesis was tested by screening *Neurospora* knockout strains  
28 impacting genes homologous to those identified in *E. coli* which alter their expression patterns in response to cold shock.  
29 In addition, a broader collection of selected knockout strains were screened to identify additional genes which play a role  
30 in the cold shock response and thus cold acclimatization. Together, the results of this screen provides the first molecular  
31 underpinning to the cold shock response in *Neurospora*,  
32

## 1 MATERIALS AND METHODS

### 2 The *Neurospora* targeted deletion collection

3 As part of the *Neurospora* Genome Project, a collection of strains containing disruptions in presumptive genes was  
4 constructed (Colot *et al.* 2006). Strains representing deletions of most of the genes of the *Neurospora* genome are  
5 available from the Fungal Genetics Stock Center (McCluskey 2003). As each deletion strain has been altered in a single,  
6 previously identified, presumptive gene – going from phenotype to sequence is greatly simplified.

7  
8 The accession numbers listed in Tables 1&2 represent the locus number of the gene subject to inactivation in the  
9 knockout strain under test. Every annotated gene in *Neurospora crassa* has been assigned a locus number of the form  
10 NCU#####. The gene identities reported in the tables are those associated with the genes as annotated on the FungiDB  
11 database as of July 2017: [fungidb.org/fungidb/](http://fungidb.org/fungidb/). The gene identities reported are based solely on the annotations currently  
12 associated with those strains and have not been independently confirmed by the authors of this study. Gene Ontologies  
13 reported are those determined by [pantherdb.org](http://pantherdb.org) (Mi *et al.* 2016) as of December 2017.

### 14 15 **Knockout sets selected to be subjected to screen.**

16 A screen of the entire library was determined to be impractical. We instead screened an abbreviated subsection of the  
17 library chosen to be more likely to yield positive responses. These fall into three basic sets.

18  
19 The first set are knockouts of genes homologous to those which show altered transcription in *E. coli* when subjected  
20 to cold shock (Phadtare and Inouye 2004). The protein sequences of *E. coli* genes identified by were retrieved from the  
21 *E. coli* database ([ecocyc.org/](http://ecocyc.org/)). These amino acid sequences were then fed into a BLAST search on the NIH NCBI site  
22 ([blast.ncbi.nlm.nih.gov/Blast.cgi](http://blast.ncbi.nlm.nih.gov/Blast.cgi)) with the output limited to *Neurospora* sequences in order to identify their nearest  
23 *Neurospora* homologs. These homologs were then searched on FungiDB to determine which had knockout strains  
24 available. From this final list, 68 were selected for screening in this study. This set was selected to determine the degree  
25 of relationship between the cold shock response in *E. coli* and *Neurospora*.

26  
27 Second, two previously organized sets of knockouts generally associated with hyphal growth and morphology and  
28 available from the FGSC were included in this screen. One set (identified as “plate 29 – morphologicals” by the FGSC)  
29 contained strains with knockouts known to cause morphological changes. The second set (identified as “Hyphal Growth  
30 Set” by the FGSC) contained strains with knockouts in genes homologous to genes in yeast known to affect polar growth.  
31 A total of 129 strains from these two sets were screened.

32  
33 The last set consists of knockouts of known transcription factors in *Neurospora*. This collection is available as a set  
34 from the Fungal Genetics Stock Center (McCluskey 2003). It was selected for this screen to determine which transcription

1 factors play a role in signaling to the cell that cold adaptation genes must be activated. A total of 147 strains from this set  
2 were screened.

3

#### 4 **Media**

5 Media and culturing procedures were those described in Davis & deSerres (1970). Growth described as being on  
6 "minimal" was in plates containing Vogel's minimal medium (Davis & deSerres 1970) with 2% agar.

7

#### 8 **Screen**

9 The selected knockout strains were subjected to a screen looking for altered responses to cold shock. Wild-type  
10 *Neurospora* progresses through a three-stage response following a shift into the cold. To induce the cold shock response,  
11 we initially grew strains at 33°C and shifted to 4°C. We selected 33°C as our "normal" temperature as the cold shock  
12 response has previously been demonstrated to be dependent on the degree of the temperature shift the hypha are  
13 subjected to (Watters et al. 2000). The larger temperature shift used here would be expected to result in tighter branching  
14 during the apical phase. We decided this was desirable as it would make any variations from the normal cold shock  
15 response more visible and easier to identify in the screen. Strains were inoculated by dropping a suspension of conidia  
16 onto Vogel's Minimal Medium and incubated overnight at 33°C. The next morning plates were moved to 4°C. After an  
17 overnight incubation at 4°C, the strain's response to cold shock was photographed and evaluated. Variations in the cold  
18 shock response from that of wild-type *Neurospora* were judged qualitatively. Knockouts were subjected to cold shock  
19 and photographed a minimum of three independent runs on separate days to assure consistency of the response within a  
20 strain.

21

#### 22 **Photomicroscopy**

23 Growing cultures were examined and photographed using a Motic 10MP digital camera attached to a Wolfe Beta  
24 Elite trinocular microscope. Photographs were taken of well separated, leading hyphae. All photomicrographs were  
25 taken using 40x magnification.

26

#### 27 **Phenotypes scored**

28 The morphology of strains following cold shock was scored visually by comparing collections of photographs of cold  
29 shock in a given strain to the response seen with a wild type strain (*Neurospora crassa* Oak Ridge). Those with altered  
30 responses were then further categorized visually into the groups reported in Table 1 "CS phenotype."

31

#### 32 **RESULTS AND DISCUSSION**

33 When *Neurospora* is subjected to a rapid temperature downshift, a 3-phase response is observed (Figure 1, Watters *et*  
34 *al.* 2000, Watters 2013). The initial response to cold shock is the growth of a single longer than normal unbranched  
35 segment. This was termed the "Lag" phase of the response. This phase is followed by a series of closely spaced apical

1 branch points, termed the “Apical” phase. Apical branch formation has been previously associated with the disruption  
2 and attempted reorganization of the normal tip-growth apparatus (Reynaga-Peña *et al.* 1995, Riquelme & Bartnicki-  
3 Garcia 2004), a mechanism distinct from that thought to be involved in lateral branching. Finally, with continued  
4 incubation at the lower temperature, the colony returns to lateral branching, termed the “Recovery” phase. Growth in this  
5 phase of the response resembles that which would be seen had the colony been grown at 4°C (or any other fixed  
6 temperature) continuously (Watters *et al.* 2000). Thus, the cold shock response appears to be a temporary disturbance to a  
7 homeostatic system which maintains branch density at a constant, evolutionarily favored, value. The morphological  
8 effects of cold shock are the indirect consequence of this system’s staged process of adjusting cellular conditions in order  
9 to compensate for the new growth temperature.

### 10 **Cold shock response of *E. coli***

11 Homeostasis in the face of temperature changes and more specifically the response to cold shock has been  
12 extensively studied in bacterial systems for over 20 years. The effect of cold shock is manifest in multiple cellular  
13 systems including: membrane rigidity (Shivaji & Prakash 2010), stability of secondary structures in DNA/RNA  
14 (Phadtare 2004), efficiency of protein folding (Phadtare 2004) and ribosome function (Gualerzi *et al.* 2011). While much  
15 remains to be described in these systems, cold shock appears to result in a multi-stage response (Phadtare 2004). First, a  
16 lag period in which growth and translation of proteins generally cease. This is followed by an adjustment phase in which  
17 specific cold-shock proteins which compensate for the changes brought on by the cold are preferentially translated  
18 (Giuliodori *et al.* 2004). In the final stage, growth continues otherwise normally, but at a reduced rate. DNA microarray  
19 transcription profiling of the cold shock response in *E. coli* by Phadtare and Inouye (2004) has shown that several  
20 hundred genes respond to cold shock, either being transiently induced/repressed or showing prolonged  
21 induction/repression. Analogous responses to cold shock and/or cold acclimation have been observed in diverse  
22 organisms including plants (Guy 1999) and animals (Canclini & Esteves 2007). Attempts to uncover cold shock proteins  
23 in fungi (Fang & Leger 2010) have met with mixed success.

### 24 **Connections between cold shock in bacteria and *Neurospora***

25 It is tempting to draw parallels between what is known about cold shock in bacterial systems and the observed  
26 response of *Neurospora* to similar cold shocks. Many of the systems affected during bacterial cold shock would be  
27 expected to impact fungal tip growth and branching (e.g. membrane fluidity). In addition, the nature and timing of the  
28 two responses are similar. Both can be adjusted by changing the intensity of the cold shock with more mild shocks  
29 (lower temperature differences) producing more mild responses and more severe shocks (larger temperature differences)  
30 producing more severe responses. Furthermore, the dynamics of the responses parallel each other. In each, there is a  
31 multistage response. There is an initial response which is transient in nature, followed by a more long-term response  
32 which largely represents a return to normal growth.  
33  
34  
35

1 During the initial study of the cold shock response in *Neurospora* (Watters et al 2000), it was observed that two  
2 classical morphological mutants (most notably “granular” and “delicate”) produced altered responses to cold shock (not  
3 reported), demonstrating that mutants could be obtained which influenced this process. We chose to screen mutants from  
4 the *Neurospora* knockout library for their cold shock response in order to provide a genetic grounding to this process  
5 which has, thus far, been lacking. We chose to use the mutants of the knockout library instead of the products of a  
6 random mutagenesis as the knockouts allow an immediate identification of gene function in most cases.

7  
8 Knockout strains displaying an altered morphological response to cold shock were classified according to the specific  
9 variation they displayed. Examples are shown in Figure 1. The “burst” phenotype was defined as displaying a large  
10 number of growing tips which stop growing, swell and then structurally fail leaving a pool of cytoplasm at the tip. The  
11 “fail” phenotype was defined as failing to display the apical branch phase characteristic of cold shock. In the “fail”  
12 response, growth proceeds normally with lateral branching following cold shock. The “thin” phenotype was defined by a  
13 very rapid decrease in hyphal diameter following cold shock. It was common to observe “thin” in combination with  
14 other altered cold shock responses. The “dense” phenotype was defined by displaying apical branching with visibly  
15 shorter distances between branch points following cold shock relative to the response in wild-type. The “weak”  
16 phenotype was defined as the opposite – an apical branch phase with visibly longer distances between branch points  
17 relative to wild-type following cold shock. Finally, the “cot-like” phenotype was characterized by a lack of apical  
18 branching, but a shift to tightly spaced lateral branches which morphologically resembled the growth of the traditional  
19 *cot* mutants at the restrictive temperature.

#### 20 21 **Screen of *E. coli* cold shock gene homolog knockout set**

22 A total of 68 *Neurospora* strains with knockouts of genes homologous to *E. coli* genes which alter transcription in  
23 response to cold shock (Phadtare and Inouye 2004) were screened. A total of 55 (81%) showed altered morphology to  
24 cold shock (Knockouts presenting alterations to the cold shock response are reported together in Table 1, sorted by  
25 phenotype). The knockouts displaying altered response to cold shock represent a variety of cellular functions. Phadtare  
26 and Inouye report genes which respond to cold shock by altering their transcription levels. Comparisons ( $\text{Chi}^2$  not  
27 shown) between these transcription changes in *E. coli* and the cold shock phenotype displayed by these genes orthologs  
28 in *Neurospora* do not suggest there are any clear associations between transcription changes and cold shock morphology.

29  
30 The screen of cold shock orthologs provides a test of the hypothesis that the cold shock response in both *E. coli* and  
31 *Neurospora* share a great deal of their cold shock response in common. The very high percentage of overlap between  
32 genes playing a role in these two widely separated organisms argues that the two responses are functionally related.

#### 33 34 **Screen of Morphological/Hyphal plate knockout sets**

1 A total of 129 selected mutant strains from the *Neurospora* knockout library were previously segregated into two  
2 collections. The “Morphological” collection resulted in known morphological variations in the knockout strains. The  
3 “Hyphal” collection consisted of knockouts of genes previously suspected to play a role in hyphal growth. These two  
4 collections were screened for alterations to their response to cold shock. In total, 30 (23%) strains were identified (Table  
5 2) that displayed variant cold shock responses. The altered responses fell into several phenotypic categories (Table 1).  
6

7 The morphological/hyphal knockouts were previously screened for temperature-dependent branch density (Watters et  
8 al. 2011). Comparing the strains identified above with alterations to their cold shock response to those previously  
9 determined to show temperature-dependent branching we find only a modest overlap with the following strains showing  
10 altered phenotypes in both: NCU02333, NCU00830, NCU04242, NCU02114, NCU04264, and NCU03076. Examining  
11 the overlap statistically via Chi-square (calculations not shown) yields a p value greater than 0.9, strongly suggesting that  
12 the overlap is random. This suggests that these two screens (cold shock vs temperature sensitive branching during  
13 steady-state growth) are independent. This leads us to conclude that the cold shock response and temperature-dependent  
14 branching are independent aspects of cold adaptation, highlighting the different genes involved in short-term adaptation  
15 to the cold as opposed to those required for sustained growth in cold environments. Additional screens of the knockout  
16 library for strains displaying growth rate dependent branching, and comparing them to those with an altered cold shock  
17 response will allow us to further examine the apparent independence of these two morphological screens.  
18

### 19 **Screen of transcription factor knockout set**

20 A total of 147 *Neurospora* strains with knockouts in genes which function as transcription factors were screened for  
21 their response to cold shock. In all, 30 (20%) showed altered morphology to cold shock (Table 1).  
22

23 As with the knockouts of orthologs of *E. coli* cold shock responding genes, the mutant strains identified in the  
24 additional screens show no observed correlations between the phenotypes observed and the annotated functions of the  
25 genes with a variety of functions being associated with the observed cold shock variations.  
26

### 27 **Frequency of knockouts yielding alterations in the cold shock was dependent on the source of the knockout**

28 As detailed above, mutants screened represented three different sets of knockouts: *E. coli* cold-shock responding  
29 orthologs, *Neurospora* morphological/hyphal growth mutants, and *Neurospora* transcription factors. These three groups  
30 displayed altered cold shock responses at different rates with the majority (81%) of the *E. coli* orthologs showing altered  
31 responses and much lower frequencies (23% and 20% respectively) of the morph/hyphal and transcription factor  
32 knockouts showing altered responses (Table 1). Additionally, the phenotypes of the altered cold shock response showed  
33 a non-random distribution with regard to the knockout set the mutant was associated with using  $\chi^2$ . Comparing  
34 knockout set vs cold shock phenotype among those with alterations yields a  $\chi^2$  of 32.2 and an associated p value < 1%.

1 Much of the significance is coming from an over-representation of “dense” cold shock responses among otherwise  
2 unidentified (i.e. “hypothetical protein”) transcription factors.

### 4 **Cold shock phenotype was not correlated to GO categorization of the knockouts**

5 The cold shock phenotype of knockouts was compared to their gene ontology categorizations via Chi<sup>2</sup> analysis.  
6 Comparing cold shock phenotype to either its Molecular Function or Biological Process categorization failed to produce  
7 significant differences (p values of ~0.75 and ~0.5 respectfully). This fails to support the suggestion that knockouts with  
8 specific GO categories are associated with specific altered phenotypes in the cold shock response.

9  
10 The data was also examined to determine if there was a non-random association between knockouts which show any  
11 alteration to their cold shock response (regardless of the specific phenotype) and those that show the wild type response  
12 vs their GO categorization. For both “Molecular Function” and “Biological Process” GO categories, no significant  
13 association was seen (via Chi<sup>2</sup>, p=0.4 and 0.5 respectfully), similarly failing to support the suggestion that knockouts  
14 with specific GO categorizations are tied to the cold shock response.

### 16 **Cold shock phenotype was weakly associated with growth rate among transcription factor knockouts**

17 Linear growth rates for the transcription factor knockouts reported by Carrillo et al (2017) were compared via T-test  
18 for knockouts showing altered cold shock responses vs those showing no alteration to the response. One possible  
19 association between growth rate and altered cold shock phenotype was found for the knockouts displaying a dense  
20 phenotype which showed statistically faster growth rates than those with no alterations to cold shock (T-test, p=0.019).  
21 This is consistent with previous observations between growth rate and cold shock (Watters et al 2000), however the  
22 opposite association (slow growth rates among mutants displaying weak cold shock responses or failure to respond) is  
23 not observed, as would be expected if growth rate was a key factor among the knockouts. Taken together, there appears  
24 to be, at best, a weak association between growth rate and alterations to the cold shock phenotype among the  
25 transcription factor knockout mutants. This stands in contrast to the observation in wild type *Neurospora* (Watters et al  
26 2000) that the morphology of the cold shock response was directly dependent on growth rate changes. This suggests that  
27 the altered morphologies observed among the knockout mutants are due to changes in gene activity associated with the  
28 knockouts and not simply the consequence of changes in growth rates in these mutants.

29  
30 In conclusion, the gene functions highlighted by these screens (Table 1) are diverse. It is unclear how the diverse  
31 gene network, partially exposed here, coordinates for the function of temperature acclimatization. The results presented  
32 here demonstrate a strong relationship between the cold shock responses of *E. coli* and *Neurospora crassa*. The  
33 phenotype under examination here (morphological response to cold shock) appears to be influenced by a diverse network  
34 of genes. Similar diversity of function has been observed in other examinations of morphogenesis in *Neurospora* (Seiler  
35 & Plamann 2003). Further work on cold acclimatization should help clarify these connections.

1

2 **ACKNOWLEDGEMENTS**

3       This work was supported by a grant from the Indiana Space Grant Consortium (INSGC). We would also like to  
4 thank Kevin McCluskey and everyone at the Fungal Genetics Stock Center for supplying the knockout strains and their  
5 diligent work in support of the fungal genetics community over the years.



1 **Table 1: Of 334 knockouts screened 115 were observed to alter the phenotype of the cold shock response.** For  
 2 each knockout strain tested (“ID”/NCU#####) we report the Cold Shock phenotype, the annotated gene function and  
 3 gene abbreviation, the set of mutants the knockout came from (*E. coli* cold shock mutant ortholog, the Morphological or  
 4 Hyphal growth plates from the FGSC, or the Transcription Factor plates from the FGSC) and the Gene Ontology  
 5 categorizations for both Molecular Function and Biological Process.  
 6

| ID       | CS Phenotype | Gene Function                                | Gene   | Knockout set           | GO: Molecular Function                 | GO: Biological Process                                                                                       |
|----------|--------------|----------------------------------------------|--------|------------------------|----------------------------------------|--------------------------------------------------------------------------------------------------------------|
| NCU03938 | burst        | alternative oxidase-5                        | aod-5  | Morph/Hyph             |                                        |                                                                                                              |
| NCU03070 | burst        | hypothetical protein                         |        | Transc Factors         | Binding                                | Biological Regulation                                                                                        |
| NCU01782 | burst        | Ras guanyl-nucleotide exchange factor RasGEF |        | <i>E. coli</i> CS Orth |                                        | Cellular Process                                                                                             |
| NCU02133 | burst        | superoxide dismutase-1                       | sod-1  | Morph/Hyph             | antioxidant/binding/catalytic Activity | Cellular Process/<br>Response to Stimulus                                                                    |
| NCU01213 | burst        | superoxide dismutase-2                       | sod-2  | <i>E. coli</i> CS Orth | Binding                                | Developmental Process                                                                                        |
| NCU03623 | burst        | ubiquitin-conjugating enzyme E               |        | Morph/Hyph             | Binding                                | Cellular Process/<br>Metabolic Process                                                                       |
| NCU04242 | burst/dense  | period-6                                     | prd-6  | Morph/Hyph             | Binding/Catalytic Activity             | Biological Regulation/<br>Cellular Process/<br>Metabolic Process                                             |
| NCU07728 | burst/thin   | siderophore regulation                       | sre    | Morph/Hyph             |                                        |                                                                                                              |
| NCU03901 | cot-like     | peroxin 14                                   | pex14  | Morph/Hyph             | Binding                                | Cellular Component<br>Organization or<br>Biogenesis/ Cellular<br>Process/ Localization/<br>Metabolic Process |
| NCU07617 | dense        | aconidiate-3                                 | acon-3 | Morph/Hyph             |                                        | Biological Regulation/<br>Developmental Process/<br>Reproduction                                             |
| NCU05410 | dense        | arginine-5                                   | arg-5  | <i>E. coli</i> CS Orth | Binding                                | Cellular Process/<br>Metabolic Process                                                                       |
| NCU02114 | dense        | G1/S-specific cyclin Cln1                    |        | Morph/Hyph             | Binding                                | Cellular Process                                                                                             |
| NCU00144 | dense        | hypothetical protein                         |        | Transc Factors         |                                        |                                                                                                              |
| NCU03120 | dense        | hypothetical protein                         |        | Transc Factors         |                                        |                                                                                                              |
| NCU03356 | dense        | hypothetical protein                         |        | Transc Factors         |                                        |                                                                                                              |
| NCU03417 | dense        | hypothetical protein                         |        | Transc Factors         |                                        |                                                                                                              |

|          |       |                                               |        |                        |                                               |                                                                                           |
|----------|-------|-----------------------------------------------|--------|------------------------|-----------------------------------------------|-------------------------------------------------------------------------------------------|
| NCU03905 | dense | hypothetical protein                          |        | Transc Factors         |                                               |                                                                                           |
| NCU03962 | dense | hypothetical protein                          |        | Transc Factors         | Binding                                       | Cellular Process/<br>Metabolic Process                                                    |
| NCU06990 | dense | hypothetical protein                          |        | Transc Factors         |                                               |                                                                                           |
| NCU01154 | dense | submerged protoperithecia-1                   | sub-1  | Transc Factors         |                                               |                                                                                           |
| NCU04899 | dense | tricarboxylic acid-15                         | tca-15 | <i>E. coli</i> CS Orth | Catalytic Activity                            | Metabolic Process                                                                         |
| NCU03415 | fail  | aldehyde dehydrogenase                        | CBS-3  | <i>E. coli</i> CS Orth |                                               |                                                                                           |
| NCU11289 | fail  | aldo-keto reductase                           |        | <i>E. coli</i> CS Orth | Catalytic<br>Activity/transporter Activity    |                                                                                           |
| NCU00097 | fail  | BEAK-1                                        | bek-1  | Transc Factors         |                                               |                                                                                           |
| NCU02017 | fail  | CBF/NF-Y family transcription factor          | ada-2  | Transc Factors         |                                               |                                                                                           |
| NCU00056 | fail  | condensing enzyme with mitochondrial function | cem-1  | <i>E. coli</i> CS Orth |                                               |                                                                                           |
| NCU00467 | fail  | COP9 signalosome-5                            | csn-5  | Morph/Hyph             | Binding                                       | Metabolic Process                                                                         |
| NCU06068 | fail  | fungal specific transcription factor          | col-25 | Transc Factors         |                                               |                                                                                           |
| NCU07788 | fail  | fungal specific transcription factor          | col-26 | Transc Factors         |                                               |                                                                                           |
| NCU07945 | fail  | fungal specific transcription factor          | tah-4  | Transc Factors         |                                               |                                                                                           |
| NCU07947 | fail  | glycolipid transfer protein HET-C2            |        | Morph/Hyph             |                                               | Localization/ Metabolic Process                                                           |
| NCU05927 | fail  | GTP-binding protein GUF1                      | GTP-7  | <i>E. coli</i> CS Orth |                                               |                                                                                           |
| NCU00528 | fail  | hyphal anastomosis-4                          | ham-4  | <i>E. coli</i> CS Orth |                                               |                                                                                           |
| NCU07561 | fail  | hypothetical protein                          |        | Transc Factors         |                                               |                                                                                           |
| NCU09120 | fail  | lysine-specific histone demethylase Aof2      |        | <i>E. coli</i> CS Orth | Binding                                       | Cellular Process/<br>Metabolic Process                                                    |
| NCU09830 | fail  | menadione-induced gene-12                     | mig-12 | Morph/Hyph             | Catalytic Activity                            | Cellular Process/<br>Metabolic Process                                                    |
| NCU09842 | fail  | mitogen activated protein kinase-1            | mak-1  | Morph/Hyph             | Catalytic Activity/signal transducer activity | Biological Regulation/<br>Cellular Process/<br>Response to Stimulus/<br>Metabolic Process |

|          |      |                                                  |         |                        |                                         |                                                                                    |
|----------|------|--------------------------------------------------|---------|------------------------|-----------------------------------------|------------------------------------------------------------------------------------|
| NCU03314 | fail | mob2-like-a                                      | mob-2a  | Morph/Hyph             | Binding/Catalytic Activity              | Cellular Process                                                                   |
| NCU09975 | fail | multidrug resistance protein 3                   |         | <i>E. coli</i> CS Orth |                                         |                                                                                    |
| NCU08294 | fail | nitrogen assimilation transcription factor nit-4 | nit-4   | Transc Factors         |                                         |                                                                                    |
| NCU03277 | fail | peroxin 10                                       | pex10   | Morph/Hyph             |                                         | Cellular Component Organization or Biogenesis/ Cellular Process/ Localization      |
| NCU02636 | fail | peroxin 4                                        | pex4    | Morph/Hyph             |                                         |                                                                                    |
| NCU01004 | fail | phosphatidylserine decarboxylase proenzyme       | CHOL-15 | <i>E. coli</i> CS Orth | Catalytic Activity                      | Cellular Process/ Metabolic Process                                                |
| NCU07832 | fail | pre-mRNA processing splicing factor 8            | msp-39  | <i>E. coli</i> CS Orth | Catalytic Activity                      | Cellular Component Organization or Biogenesis/ Cellular Process/ Metabolic Process |
| NCU06028 | fail | quinic acid utilization activator                | qa-1F   | Transc Factors         |                                         |                                                                                    |
| NCU06205 | fail | regulator of conidiation-1                       | rco-1   | Morph/Hyph             |                                         |                                                                                    |
| NCU06145 | fail | RING-6                                           | RING-6  | Morph/Hyph             |                                         |                                                                                    |
| NCU02214 | fail | TAH-2                                            | tah-2   | Transc Factors         |                                         |                                                                                    |
| NCU10008 | fail | tricarboxylic acid-14                            | tca-14  | <i>E. coli</i> CS Orth |                                         | Cellular Process/ Metabolic Process                                                |
| NCU02356 | fail | white collar 1                                   | wc-1    | Transc Factors         | Binding                                 |                                                                                    |
| NCU02173 | fail | zinc finger transcription factor-52              | zfn-52  | Transc Factors         |                                         |                                                                                    |
| NCU05591 | thin | ABC transporter CDR4                             |         | Morph/Hyph             | Catalytic Activity/transporter Activity | Cellular Process/ Metabolic Process                                                |
| NCU03013 | thin | anchored cell wall protein-10                    | acw-10  | Morph/Hyph             | antioxidant/binding/catalytic Activity  | Cellular Process/ Response to Stimulus                                             |
| NCU02333 | thin | arginase-1                                       | aga-1   | Morph/Hyph             | Binding/Catalytic Activity              | Cellular Process/ Metabolic Process                                                |
| NCU03184 | thin | C2H2 conidiation transcription factor FlbC       |         | Morph/Hyph             |                                         |                                                                                    |

|          |      |                                                                 |          |                        |                            |                                                                                                |
|----------|------|-----------------------------------------------------------------|----------|------------------------|----------------------------|------------------------------------------------------------------------------------------------|
| NCU07075 | thin | calcium exchanger                                               | cax      | Morph/Hyph             | transporter activity       | Biological Regulation/<br>Cellular Process                                                     |
| NCU05770 | thin | catalase-2                                                      | cat-2    | <i>E. coli</i> CS Orth | antioxidant/binding        | Cellular Process/<br>Response to Stimulus/<br>Metabolic Process                                |
| NCU05051 | thin | COL-23                                                          | col-23   | Transc Factors         |                            |                                                                                                |
| NCU00830 | thin | ctr copper transporter                                          | tcu-1    | Morph/Hyph             |                            |                                                                                                |
| NCU08216 | thin | cystathionine beta-synthase                                     | MET-11   | <i>E. coli</i> CS Orth | Binding                    | Cellular Process/<br>Metabolic Process                                                         |
| NCU03076 | thin | delta-1-pyrroline-5-carboxylate<br>dehydrogenase                |          | Morph/Hyph             |                            |                                                                                                |
| NCU08968 | thin | dimethyladenosine transferase                                   |          | <i>E. coli</i> CS Orth |                            | Cellular Component<br>Organization or<br>Biogenesis/ Cellular<br>Process/ Metabolic<br>Process |
| NCU01772 | thin | DNA-directed RNA polymerase<br>III polypeptide                  | rpo-10   | <i>E. coli</i> CS Orth |                            | Cellular Process/<br>Metabolic Process                                                         |
| NCU02542 | thin | embden-meyerhof pathway-1                                       | emp-1    | Morph/Hyph             | Catalytic Activity         | Biological Regulation/<br>Cellular Process/<br>Metabolic Process                               |
| NCU01744 | thin | enhancer-2 of am                                                | en(am)-2 | <i>E. coli</i> CS Orth | Catalytic Activity         | Cellular Process/<br>Metabolic Process                                                         |
| NCU04264 | thin | extracellular developmental<br>signal biosynthesis protein FluG |          | Morph/Hyph             | Binding                    | Cellular Process/<br>Metabolic Process                                                         |
| NCU04140 | thin | FK506 resistant-2                                               | fkr-2    | <i>E. coli</i> CS Orth | Binding/Catalytic Activity | Cellular Process/<br>Metabolic Process                                                         |
| NCU09930 | thin | folic acid synthesis protein                                    | fol-9    | <i>E. coli</i> CS Orth | transporter activity       | Cellular Process/<br>Metabolic Process                                                         |
| NCU05606 | thin | glucosidase 2 subunit beta                                      | GHX-4    | <i>E. coli</i> CS Orth | Binding/Catalytic Activity | Biological Regulation/<br>Metabolic Process                                                    |
| NCU01528 | thin | glyceraldehyde-3-phosphate<br>dehydrogenase-1                   | gpd-1    | <i>E. coli</i> CS Orth | Catalytic Activity         | Metabolic Process                                                                              |
| NCU06005 | thin | glycerol kinase                                                 | GLK-1    | <i>E. coli</i> CS Orth |                            |                                                                                                |
| NCU02630 | thin | heat shock protein 78                                           | hsp78    | <i>E. coli</i> CS Orth |                            |                                                                                                |
| NCU07156 | thin | histidine-6                                                     | his-6    | <i>E. coli</i> CS Orth |                            |                                                                                                |

|          |           |                                                                                 |        |                        |                            |                                                                                                           |
|----------|-----------|---------------------------------------------------------------------------------|--------|------------------------|----------------------------|-----------------------------------------------------------------------------------------------------------|
| NCU02556 | thin      | histone acetyl transferase-2                                                    | hat-2  | <i>E. coli</i> CS Orth |                            | Cellular Component Organization or Biogenesis/ Cellular Process/ Metabolic Process                        |
| NCU01629 | thin      | hypothetical protein                                                            |        | Transc Factors         |                            |                                                                                                           |
| NCU04669 | thin      | hypothetical protein homologous to Bactericidal permeability-increasing protein |        | Morph/Hyph             |                            |                                                                                                           |
| NCU04561 | thin      | melanization defective-1                                                        | mld-1  | Transc Factors         |                            |                                                                                                           |
| NCU09767 | thin      | membrane transporter                                                            |        | <i>E. coli</i> CS Orth |                            |                                                                                                           |
| NCU04791 | thin      | menadione-induced gene-10                                                       | mig-10 | <i>E. coli</i> CS Orth |                            |                                                                                                           |
| NCU05151 | thin      | phosphoketolase                                                                 | PHK-1  | <i>E. coli</i> CS Orth |                            |                                                                                                           |
| NCU06342 | thin      | phospholipase D                                                                 | PLA-5  | <i>E. coli</i> CS Orth |                            | Cellular Process/ Localization/ Locomotion                                                                |
| NCU05295 | thin      | proteasome catalytic alpha-5                                                    | pca-5  | Morph/Hyph             |                            | Cellular Process/ Metabolic Process                                                                       |
| NCU09366 | thin      | proteasome catalytic beta-6                                                     | pcb-6  | Morph/Hyph             | Catalytic Activity         | Cellular Process/ Metabolic Process                                                                       |
| NCU01613 | thin      | protoperithecia-2                                                               | pp-2   | Morph/Hyph             | Catalytic Activity         | Biological Regulation/ Cellular Component Organization or Biogenesis/ Cellular Process/ Metabolic Process |
| NCU02260 | thin      | regulatory particle, ATPase-like-3                                              | rpt-3  | Morph/Hyph             |                            |                                                                                                           |
| NCU02055 | thin      | uridine nucleosidase Urh1                                                       | NUS-1  | <i>E. coli</i> CS Orth |                            |                                                                                                           |
| NCU07705 | thin/fail | C6 finger domain-containing protein                                             | clr-1  | Transc Factors         |                            |                                                                                                           |
| NCU08000 | thin/fail | cutinase transcription factor 1 alpha                                           | far1   | Transc Factors         |                            |                                                                                                           |
| NCU05536 | thin/fail | hypothetical protein                                                            |        | Transc Factors         | Binding/Catalytic Activity | Cellular Component Organization or Biogenesis/ Cellular Process/ Response to Stimulus/ Metabolic Process  |

|          |           |                                       |         |                        |                            |                                                                   |
|----------|-----------|---------------------------------------|---------|------------------------|----------------------------|-------------------------------------------------------------------|
| NCU08651 | thin/fail | zinc binuclear cluster-type protein   | col-27  | Transc Factors         |                            |                                                                   |
| NCU07732 | thin/fail | arginine-2                            | arg-2   | <i>E. coli</i> CS Orth | Binding/Catalytic Activity | Cellular Process/<br>Metabolic Process                            |
| NCU04117 | thin/fail | ATP-dependent permease MDL2           | ABC-7   | <i>E. coli</i> CS Orth |                            |                                                                   |
| NCU06659 | thin/fail | GTP-binding protein                   | GTP-3   | <i>E. coli</i> CS Orth |                            | Cellular Process/<br>Metabolic Process                            |
| NCU08693 | thin/fail | heat shock protein 70-5               | hsp70-5 | <i>E. coli</i> CS Orth | Binding                    | Cellular Process/<br>Response to Stimulus/<br>Metabolic Process   |
| NCU10760 | thin/fail | jumonji domain-containing protein 5   |         | <i>E. coli</i> CS Orth |                            |                                                                   |
| NCU08858 | thin/fail | MFS alpha-glucoside transporter       | SUT-1   | <i>E. coli</i> CS Orth | transporter activity       | Cellular Process/<br>Localization                                 |
| NCU00793 | thin/fail | trehalose phosphate synthase          | GT20-2  | <i>E. coli</i> CS Orth | Catalytic Activity         | Cellular Process/<br>Response to<br>Stimulus/Metabolic<br>Process |
| NCU08336 | thin/fail | tricarboxylic acid-12                 | tca-12  | <i>E. coli</i> CS Orth | Catalytic Activity         | Cellular Process/<br>Localization/ Metabolic<br>Process           |
| NCU00771 | thin/fail | UBX domain-containing protein 7       |         | <i>E. coli</i> CS Orth |                            |                                                                   |
| NCU04583 | weak      | acetyltransferase                     |         | <i>E. coli</i> CS Orth | Catalytic Activity         |                                                                   |
| NCU00499 | weak      | all development altered-1             | ada-1   | Transc Factors         |                            |                                                                   |
| NCU00567 | weak      | arginine-6                            | arg-6   | <i>E. coli</i> CS Orth | Binding                    | Cellular Process/<br>Metabolic Process                            |
| NCU04303 | weak      | asparagine synthetase 2               | asn-1   | <i>E. coli</i> CS Orth | Binding/Catalytic Activity | Cellular Process/<br>Metabolic Process                            |
| NCU00919 | weak      | ATP-dependent RNA helicase rok-1      | drh-16  | <i>E. coli</i> CS Orth |                            |                                                                   |
| NCU08933 | weak      | cellular nucleic acid-binding protein |         | <i>E. coli</i> CS Orth |                            |                                                                   |
| NCU01408 | weak      | COP9 signalosome-3                    | csn-3   | Morph/Hyph             |                            | Cellular Process/<br>Metabolic Process                            |
| NCU01625 | weak      | DNA repair helicase RAD3              | DNR-10  | <i>E. coli</i> CS Orth | Binding/Catalytic Activity | Cellular Process/<br>Metabolic Process                            |

|          |      |                                         |        |                        |                                       |                                                                                                |
|----------|------|-----------------------------------------|--------|------------------------|---------------------------------------|------------------------------------------------------------------------------------------------|
| NCU07027 | weak | glycogen phosphorylase                  | GYP-1  | <i>E. coli</i> CS Orth | Binding/Catalytic Activity            | Cellular Process/<br>Metabolic Process                                                         |
| NCU06523 | weak | glycosylhydrolase family 13-4           | gh13-4 | <i>E. coli</i> CS Orth | Catalytic Activity                    | Metabolic Process                                                                              |
| NCU01589 | weak | heat shock protein 60                   | hsp60  | <i>E. coli</i> CS Orth | Binding                               | Cellular Component<br>Organization or<br>Biogenesis/ Cellular<br>Process/ Metabolic<br>Process |
| NCU05909 | weak | hypothetical protein                    |        | Transc Factors         |                                       |                                                                                                |
| NCU08439 | weak | leptomycin B resistance protein<br>pmd1 | ABC-2  | <i>E. coli</i> CS Orth | transporter activity                  | Cellular Process/<br>Metabolic Process                                                         |
| NCU00565 | weak | lipoic acid synthetase                  | LIA-1  | <i>E. coli</i> CS Orth | Catalytic Activity                    | Cellular Process/<br>Metabolic Process                                                         |
| NCU04339 | weak | ribokinase                              | RIK-8  | <i>E. coli</i> CS Orth | Catalytic Activity                    | Cellular Process/<br>Metabolic Process                                                         |
| NCU03894 | weak | serine/threonine protein kinase-4       | stk-4  | Morph/Hyph             | Binding/signal transducer<br>activity | Biological Regulation/<br>Cellular Process/<br>Developmental Process/<br>Response to Stimulus  |
| NCU06017 | weak | thiosulfate sulfurtransferase           | TST-1  | <i>E. coli</i> CS Orth |                                       | Localization/ Response<br>to Stimulus/ Metabolic<br>Process                                    |
| NCU10053 | weak | thymidylate synthase                    | pyr-8  | <i>E. coli</i> CS Orth |                                       |                                                                                                |
| NCU08658 | weak | zinc finger transcription factor-<br>50 | znf-50 | Transc Factors         |                                       |                                                                                                |

1

2

- 1 **Table 2: Of knockouts screened, 229 presented no change to the cold shock morphology.** Columns are the same as  
 2 for Table 1.

| ID       | Gene Function                                           | Gene    | Knockout set           | GO: Molecular Function                                   | GO: Biological Process                                                                      |
|----------|---------------------------------------------------------|---------|------------------------|----------------------------------------------------------|---------------------------------------------------------------------------------------------|
| NCU00017 | hypothetical protein                                    |         | Tranc Factors          |                                                          |                                                                                             |
| NCU00019 | Fork head protein homolog 1                             | FKH1    | Tranc Factors          |                                                          |                                                                                             |
| NCU00038 | zinc finger transcription factor-32                     | znf-32  | Tranc Factors          |                                                          |                                                                                             |
| NCU00081 | DNA topoisomerase 3-beta                                | dnt-3   | <i>E. coli</i> CS Orth |                                                          |                                                                                             |
| NCU00090 | pH-response transcription factor pacC/RIM101            | pacc-1  | Tranc Factors          |                                                          |                                                                                             |
| NCU00105 | ribosome biogenesis-58                                  | rbg-58  | Morph/Hyph             |                                                          | Cellular Component<br>Organization or Biogenesis                                            |
| NCU00135 | Phosphatidyl synthase, phosphatidyl synthase, variant 1 | gpl-1   | Morph/Hyph             |                                                          | Cellular Process/Metabolic<br>Process                                                       |
| NCU00157 | COP9 signalosome-1                                      | csn-1   | Morph/Hyph             |                                                          |                                                                                             |
| NCU00204 | hypothetical protein                                    |         | Morph/Hyph             |                                                          |                                                                                             |
| NCU00217 | hypothetical protein                                    |         | Tranc Factors          |                                                          |                                                                                             |
| NCU00233 | glycosyl hydrolase family 16-15                         | gh16-15 | Tranc Factors          |                                                          |                                                                                             |
| NCU00285 | hypothetical protein                                    |         | Tranc Factors          |                                                          |                                                                                             |
| NCU00289 | tall aerial hyphae-1                                    | tah-1   | Tranc Factors          |                                                          |                                                                                             |
| NCU00329 | vegetative asexual development-1                        | vad-1   | Tranc Factors          |                                                          |                                                                                             |
| NCU00355 | catalase-3                                              | cat-3   | Morph/Hyph             | Antioxidant Activity/<br>Binding/Catalytic Activity      | Response to Stimulus/<br>Cellular Process/ Metabolic<br>Process                             |
| NCU00396 | pre-mRNA-splicing factor rse-1                          | msp-5   | Morph/Hyph             | Binding                                                  | Cellular Process/Metabolic<br>Process                                                       |
| NCU00406 | velvet                                                  | vel     | Morph/Hyph             | Binding/Signal Transducer<br>Activity/Catalytic Activity | Biological<br>Regulation/Developmental<br>Process/ Response to<br>Stimulus/Cellular Process |



|          |                                                         |        |                        |                              |                                                                                       |
|----------|---------------------------------------------------------|--------|------------------------|------------------------------|---------------------------------------------------------------------------------------|
| NCU00554 | Aspartate-semialdehyde dehydrogenase                    | hom-1  | Morph/Hyph             |                              |                                                                                       |
| NCU00609 | initiation-specific alpha-1,6-mannosyltransferase       | och-1  | Morph/Hyph             | Catalytic Activity           | Cellular Process/ Metabolic Process                                                   |
| NCU00631 | chromatin remodelling factor 9-1                        | crf9-1 | Transc Factors         |                              |                                                                                       |
| NCU00634 | Ribosomal protein L14                                   | crp-47 | Morph/Hyph             | Structural Molecule Activity | Cellular Component Organization or Biogenesis                                         |
| NCU00694 | hypothetical protein                                    |        | Transc Factors         |                              |                                                                                       |
| NCU00749 | conidiation at high carbon dioxide-1                    | chc-1  | Transc Factors         |                              |                                                                                       |
| NCU00768 | mRNA binding post-transcriptional regulator             |        | Morph/Hyph             |                              |                                                                                       |
| NCU00808 | zinc finger transcription factor-48                     | znf-48 | Transc Factors         |                              |                                                                                       |
| NCU00810 | Beta-galactosidase                                      | gh2-3  | Morph/Hyph             | Catalytic Activity           | Cellular Process/ Metabolic Process                                                   |
| NCU00824 | histone deacetylase-3                                   | hda-3  | Morph/Hyph             | Binding/Catalytic Activity   | Biological Regulation/Cellular Component Organization or Biogenesis/ Cellular Process |
| NCU00902 | zinc finger white collar protein WC2                    | wc-2   | Transc Factors         |                              |                                                                                       |
| NCU00923 | topogenesis of outer membrane beta barrel protein 37    | tob37  | Morph/Hyph             |                              |                                                                                       |
| NCU00945 | fungal specific transcription factor                    | col-20 | Transc Factors         |                              |                                                                                       |
| NCU00959 | succinate dehydrogenase iron-sulfur protein             | tca-10 | <i>E. coli</i> CS Orth |                              | Cellular Process/ Metabolic Process                                                   |
| NCU01020 | hypothetical protein                                    |        | Morph/Hyph             |                              |                                                                                       |
| NCU01033 | hypothetical protein related to regulatory protein wetA |        | Morph/Hyph             | Binding                      |                                                                                       |
| NCU01037 | hypothetical protein                                    |        | Morph/Hyph             |                              |                                                                                       |
| NCU01097 | hypothetical protein                                    |        | Transc Factors         |                              |                                                                                       |
| NCU01122 | hypothetical protein                                    |        | Transc Factors         |                              |                                                                                       |
| NCU01181 | acyl-CoA dehydrogenase family member 11                 | acd-3  | Morph/Hyph             |                              |                                                                                       |
| NCU01197 | cell wall biogenesis protein phosphatase Ssd1           | gul-1  | Morph/Hyph             |                              |                                                                                       |

|          |                                                                |        |                |                                                          |                                                                                                                                                       |
|----------|----------------------------------------------------------------|--------|----------------|----------------------------------------------------------|-------------------------------------------------------------------------------------------------------------------------------------------------------|
| NCU01213 | superoxide dismutase-2                                         | sod-2  | Morph/Hyph     | Antioxidant Activity/Binding/Catalytic Activity          | Developmental Process                                                                                                                                 |
| NCU01225 | ubiquitin conjugating enzyme - 13                              | uce-13 | Morph/Hyph     |                                                          |                                                                                                                                                       |
| NCU01312 | myb-like DNA-binding protein myb-1                             | rca-1  | Morph/Hyph     |                                                          |                                                                                                                                                       |
| NCU01368 | proteasome component C11                                       | pcb-4  | Morph/Hyph     | Catalytic Activity                                       | Cellular Process/ Metabolic Process                                                                                                                   |
| NCU01478 | fungal specific transcription factor domain-containing protein |        | Transc Factors |                                                          |                                                                                                                                                       |
| NCU01642 | hypothetical protein homologous to Neurofibromin               |        | Morph/Hyph     |                                                          |                                                                                                                                                       |
| NCU01833 | Two-component histidine kinase CHK-1                           | nik-2  | Morph/Hyph     |                                                          |                                                                                                                                                       |
| NCU01994 | transcription factor-1                                         | tcf-1  | Transc Factors |                                                          |                                                                                                                                                       |
| NCU02057 | autoinducer 2 sensor kinase/phosphatase luxQ                   |        | Morph/Hyph     |                                                          |                                                                                                                                                       |
| NCU02094 | vegetative asexual development-2                               | vad-2  | Transc Factors | Binding                                                  | Cellular Process/Metabolic Process                                                                                                                    |
| NCU02111 | myosin-5                                                       | myo-5  | Morph/Hyph     | Binding/ Structural Molecule Activity/Catalytic Activity | Cellular Component Organization or Biogenesis/Localization Process/ Cellular Process                                                                  |
| NCU02142 | hypothetical protein                                           |        | Transc Factors |                                                          |                                                                                                                                                       |
| NCU02160 | small GTPase RAC                                               | rac-1  | Morph/Hyph     | Binding/Signal Transducer Activity/Catalytic Activity    | Biological Regulation/Cellular Component Organization or Biogenesis/ Developmental Process/ Response to Stimulus/ Cellular Process/ Metabolic Process |
| NCU02226 | methylthioribose-1-phosphate isomerase                         | met-23 | Morph/Hyph     | Catalytic Activity                                       | Cellular Process/ Metabolic Process                                                                                                                   |

|          |                                              |        |                        |                                         |                                                                                                         |
|----------|----------------------------------------------|--------|------------------------|-----------------------------------------|---------------------------------------------------------------------------------------------------------|
| NCU02250 | ATP synthase subunit ATP9                    | oli    | Morph/Hyph             | Transporter Activity/Catalytic Activity | Cellular Process/Metabolic Process                                                                      |
| NCU02265 | period clock protein FRQ                     | frq    | Morph/Hyph             |                                         |                                                                                                         |
| NCU02307 | hypothetical protein                         |        | Tranc Factors          |                                         |                                                                                                         |
| NCU02387 | nuclear import and export protein Msn5       |        | Morph/Hyph             | Binding/ Transporter Activity           | Biological Regulation/Localization Process/ Cellular Process                                            |
| NCU02406 | nuclear protein                              |        | Morph/Hyph             | Binding                                 | Cellular Component Organization or Biogenesis                                                           |
| NCU02498 | Cullin-3                                     | cul-3  | Morph/Hyph             | Binding                                 | Cellular Process/Metabolic Process                                                                      |
| NCU02576 | zinc finger transcription factor-39          | zfn-39 | Tranc Factors          |                                         |                                                                                                         |
| NCU02604 | U3 small nucleolar RNA-associated protein 10 | rbg-7  | Morph/Hyph             | Binding                                 | Biological Regulation/Cellular Component Organization or Biogenesis/Cellular Process/ Metabolic Process |
| NCU02639 | Argininosuccinate synthase                   | arg-1  | <i>E. coli</i> CS Orth | Catalytic Activity                      | Cellular Process/ Metabolic Process                                                                     |
| NCU02666 | zinc finger transcription factor-58          | zfn-58 | Tranc Factors          |                                         |                                                                                                         |
| NCU02671 | cutinase G-box binding protein               | msn-1  | Tranc Factors          |                                         |                                                                                                         |
| NCU02699 | zinc finger transcription factor-14          | zfn-14 | Tranc Factors          |                                         |                                                                                                         |
| NCU02712 | acetate-10                                   | ace-10 | <i>E. coli</i> CS Orth |                                         |                                                                                                         |
| NCU02713 | conidial separation-1                        | csp-1  | Tranc Factors          | Binding                                 | Cellular Process/ Metabolic Process                                                                     |
| NCU02724 | transcription factor-21                      | tcf-21 | Tranc Factors          |                                         |                                                                                                         |
| NCU02752 | zinc finger transcription factor-47          | zfn-47 | Tranc Factors          |                                         |                                                                                                         |

|          |                                                  |        |                        |                            |                                            |
|----------|--------------------------------------------------|--------|------------------------|----------------------------|--------------------------------------------|
| NCU02768 | transcription factor-20                          | tcf-20 | Tranc Factors          |                            |                                            |
| NCU02794 | Fso1                                             | so     | Morph/Hyph             |                            |                                            |
| NCU02826 | sodium/calcium exchanger protein                 | trm-16 | Morph/Hyph             | Transporter Activity       |                                            |
| NCU02896 | all development altered-3                        | ada-3  | Tranc Factors          |                            |                                            |
| NCU02934 | hypothetical protein                             |        | Tranc Factors          |                            |                                            |
| NCU02948 | non-anchored cell wall protein-4                 | ncw-4  | <i>E. coli</i> CS Orth | Catalytic Activity         |                                            |
| NCU02957 | hypothetical protein                             |        | Tranc Factors          |                            |                                            |
| NCU02994 | hypothetical protein                             |        | Tranc Factors          |                            |                                            |
| NCU03033 | transcription factor-26                          | tcf-26 | Tranc Factors          | Binding                    | Biological Regulation/Response to Stimulus |
| NCU03043 | C2H2 finger domain-containing protein FlbC       | acon-4 | Tranc Factors          |                            |                                            |
| NCU03073 | DNA polymerase epsilon, subunit D                | pole-4 | Tranc Factors          |                            |                                            |
| NCU03077 | hypothetical protein                             |        | Tranc Factors          |                            |                                            |
| NCU03096 | bromodomain associated domain-containing protein |        | Morph/Hyph             |                            |                                            |
| NCU03110 | hypothetical protein                             |        | Tranc Factors          |                            |                                            |
| NCU03125 | NIMA-interacting protein TinC                    |        | Morph/Hyph             |                            |                                            |
| NCU03164 | two-component system response regulator          |        | Morph/Hyph             |                            |                                            |
| NCU03184 | zinc finger transcription factor-21              | znf-21 | Tranc Factors          |                            |                                            |
| NCU03206 | zinc finger transcription factor-22              | znf-22 | Tranc Factors          |                            |                                            |
| NCU03244 | WD repeat protein                                |        | Tranc Factors          |                            |                                            |
| NCU03281 | transport of copper-2                            | tcu-2  | Morph/Hyph             |                            |                                            |
| NCU03320 | all development altered-4                        | ada-4  | Tranc Factors          |                            |                                            |
| NCU03479 | endoribonuclease ysh-1                           | paa-5  | Morph/Hyph             | Binding/Catalytic Activity | Metabolic Process                          |
| NCU03489 | colonial-21                                      | col-21 | Tranc Factors          |                            |                                            |
| NCU03576 | conidiophore development protein hymA            | hym-1  | Morph/Hyph             | Binding                    |                                            |
| NCU03593 | homeobox domain-containing protein               | kal-1  | Tranc Factors          |                            |                                            |
| NCU03643 | fatty acid regulation-2                          | far-2  | Tranc Factors          |                            |                                            |

|          |                                              |        |                        |                                                          |                                                                                                                                      |
|----------|----------------------------------------------|--------|------------------------|----------------------------------------------------------|--------------------------------------------------------------------------------------------------------------------------------------|
|          |                                              |        |                        |                                                          | Cellular Component<br>Organization or Biogenesis/<br>Cellular Process/ Metabolic<br>Process                                          |
| NCU03669 | AdoMet-dependent rRNA methyltransferase spb1 | rmt-3  | <i>E. coli</i> CS Orth | Catalytic Activity                                       |                                                                                                                                      |
| NCU03686 | oxidase assembly protein 2                   | tah-3  | Tranc Factors          |                                                          |                                                                                                                                      |
| NCU03699 | zinc finger transcription factor-13          | znf-13 | Tranc Factors          |                                                          |                                                                                                                                      |
| NCU03702 | rRNA 2'-O-methyltransferase fibrillarlin     | rbg-16 | Morph/Hyph             |                                                          |                                                                                                                                      |
|          |                                              |        |                        |                                                          | Biological<br>Regulation/Cellular Process/<br>Metabolic Process                                                                      |
| NCU03725 | vegetative incompatibility blocked-1         | vib-1  | Morph/Hyph             | Binding                                                  |                                                                                                                                      |
| NCU03931 | all development altered-5                    | ada-5  | Tranc Factors          |                                                          |                                                                                                                                      |
| NCU04001 | female fertility-7                           | ff-7   | Tranc Factors          | Catalytic Activity                                       |                                                                                                                                      |
|          |                                              |        |                        |                                                          | Biological<br>Regulation/Developmental<br>Process/ Multicellular<br>Organismal Process/<br>Response to Stimulus/<br>Cellular Process |
| NCU04096 | serine/threonine-protein kinase 3            | prk-9  | Morph/Hyph             | Binding/Signal Transducer<br>Activity/Catalytic Activity |                                                                                                                                      |
|          |                                              |        |                        |                                                          | Response to Stimulus/<br>Metabolic Process                                                                                           |
| NCU04142 | heat shock protein 80                        | hsp80  | <i>E. coli</i> CS Orth |                                                          |                                                                                                                                      |
| NCU04179 | C2H2 transcription factor                    | sah-1  | Tranc Factors          |                                                          |                                                                                                                                      |
| NCU04211 | hypothetical protein                         |        | Tranc Factors          |                                                          |                                                                                                                                      |
| NCU04302 | ubiquitin-conjugating enzyme E               | nup-22 | Morph/Hyph             |                                                          |                                                                                                                                      |
| NCU04359 | hypothetical protein                         |        | Tranc Factors          |                                                          |                                                                                                                                      |
| NCU04390 | fungal specific transcription factor         | col-22 | Tranc Factors          |                                                          |                                                                                                                                      |
| NCU04513 | ubiquitin conjugating enzyme Ubc14           | uce-14 | Morph/Hyph             | Catalytic Activity                                       | Metabolic Process                                                                                                                    |
| NCU04533 | DUF1881 domain-containing protein            | app    | Morph/Hyph             |                                                          |                                                                                                                                      |
| NCU04619 | hypothetical protein                         |        | Tranc Factors          |                                                          |                                                                                                                                      |

|          |                                                           |        |                        |                                         |                                                                                                                                                   |
|----------|-----------------------------------------------------------|--------|------------------------|-----------------------------------------|---------------------------------------------------------------------------------------------------------------------------------------------------|
| NCU04628 | hypothetical protein                                      |        | Tranc Factors          |                                         |                                                                                                                                                   |
| NCU04731 | Sterol regulatory element binding protein sah-2           | sah-2  | Tranc Factors          |                                         |                                                                                                                                                   |
| NCU04733 | UvrD/REP helicase                                         | mus-50 | <i>E. coli</i> CS Orth |                                         |                                                                                                                                                   |
| NCU04834 | sensor histidine kinase/response regulator                | phy-1  | Morph/Hyph             |                                         |                                                                                                                                                   |
| NCU04851 | hypothetical protein                                      |        | Tranc Factors          |                                         |                                                                                                                                                   |
| NCU04866 | all development altered-6                                 | ada-6  | Tranc Factors          |                                         |                                                                                                                                                   |
| NCU05046 | calcium-transporting ATPase 3                             | ena-1  | Morph/Hyph             | Transporter Activity/Catalytic Activity | Cellular Process/ Metabolic Process                                                                                                               |
| NCU05210 | postreplication repair E3 ubiquitin-protein ligase rad-18 | uvs-2  | Tranc Factors          | Catalytic Activity                      | Response to Stimulus/ Cellular Process/ Metabolic Process                                                                                         |
| NCU05242 | zinc finger transcription factor-25                       | zfn-25 | Tranc Factors          |                                         |                                                                                                                                                   |
| NCU05250 | nuclear division-76                                       | div-76 | Tranc Factors          | Binding                                 | Biological Regulation/Cellular Component Organization or Biogenesis/Localization Process/ Response to Stimulus/Cellular Process/Metabolic Process |
| NCU05294 | zinc finger transcription factor-40                       | zfn-40 | Tranc Factors          |                                         |                                                                                                                                                   |
| NCU05383 | fungal specific transcription factor                      | col-24 | Tranc Factors          |                                         |                                                                                                                                                   |
| NCU05411 | pathway-specific nitrogen regulator                       |        | Tranc Factors          |                                         |                                                                                                                                                   |
| NCU05637 | hypothetical protein                                      |        | Tranc Factors          |                                         |                                                                                                                                                   |
| NCU05767 | zinc finger transcription factor-10                       | zfn-10 | Tranc Factors          |                                         |                                                                                                                                                   |
| NCU05790 | phytochrome-like histidine kinase 2                       | phy-2  | Morph/Hyph             |                                         |                                                                                                                                                   |
| NCU05854 | hypothetical protein                                      |        | Morph/Hyph             |                                         |                                                                                                                                                   |
| NCU05858 | fatty acid oxygenase                                      | fam-2  | Morph/Hyph             | Catalytic Activity                      |                                                                                                                                                   |

|          |                                       |        |               |                            |                                                                                                                              |
|----------|---------------------------------------|--------|---------------|----------------------------|------------------------------------------------------------------------------------------------------------------------------|
| NCU05891 | arid/bright domain-containing protein |        | Morph/Hyph    | Binding                    | Biological Regulation/Cellular Process/ Metabolic Process                                                                    |
| NCU05956 | Beta-galactosidase                    | gh2-2  | Morph/Hyph    | Catalytic Activity         | Cellular Process/ Metabolic Process                                                                                          |
| NCU05993 | hypothetical protein                  |        | Tranc Factors |                            |                                                                                                                              |
| NCU05994 | transcription factor-10               | tcf-10 | Tranc Factors | Binding                    | Cellular Component Organization or Biogenesis/Localization Process/Response to Stimulus/Cellular Process/ Metabolic Process  |
| NCU06049 | DNA damage response protein RcaA      | nbs1   | Morph/Hyph    | Binding/Catalytic Activity | Biological Regulation/Cellular Component Organization or Biogenesis/Response to Stimulus/ Cellular Process/Metabolic Process |
| NCU06145 | RING-6                                |        | Morph/Hyph    |                            |                                                                                                                              |
| NCU06173 | hypothetical protein                  |        | Tranc Factors |                            |                                                                                                                              |
| NCU06175 | Peroxisomal membrane protein          | pex3   | Morph/Hyph    |                            |                                                                                                                              |
| NCU06186 | hypothetical protein                  |        | Tranc Factors |                            |                                                                                                                              |
| NCU06205 | transcriptional repressor rco-1       | rco-1  | Tranc Factors |                            |                                                                                                                              |
| NCU06213 | zinc finger transcription factor-9    | znf-9  | Tranc Factors |                            |                                                                                                                              |
| NCU06265 | Hyphal anastomosis-13 protein         | ham-13 | Morph/Hyph    |                            |                                                                                                                              |
| NCU06407 | zinc finger transcription factor 1    | vad-3  | Tranc Factors |                            |                                                                                                                              |
| NCU06411 | vegetative asexual development-4      | vad-4  | Tranc Factors | Binding/Catalytic Activity | Metabolic Process                                                                                                            |

|          |                                          |        |                |                                                       |                                                                                                                                                       |
|----------|------------------------------------------|--------|----------------|-------------------------------------------------------|-------------------------------------------------------------------------------------------------------------------------------------------------------|
| NCU06419 | map kinase kinase                        | mek-1  | Morph/Hyph     | Binding/Signal Transducer Activity/Catalytic Activity | Biological Regulation/Developmental Process/ Response to Stimulus/Cellular Process                                                                    |
| NCU06429 | alpha-actinin                            |        | Morph/Hyph     |                                                       |                                                                                                                                                       |
| NCU06440 | proteasome component PRE6                | pca-4  | Morph/Hyph     | Catalytic Activity                                    | Cellular Process/ Metabolic Process                                                                                                                   |
| NCU06454 | Rho-type GTPase                          | cdc42  | Morph/Hyph     | Binding/Signal Transducer Activity/Catalytic Activity | Biological Regulation/Cellular Component Organization or Biogenesis/ Developmental Process/ Response to Stimulus/ Cellular Process/ Metabolic Process |
| NCU06503 | zinc finger transcription factor-24      | znf-24 | Transc Factors |                                                       |                                                                                                                                                       |
| NCU06531 | hypothetical protein                     |        | Morph/Hyph     |                                                       |                                                                                                                                                       |
| NCU06605 | DNA damage-binding protein 1             | dim-8  | Morph/Hyph     | Binding                                               | Response to Stimulus/ Cellular Process/ Metabolic Process                                                                                             |
| NCU06650 | secretory phospholipase A2               | spp-3  | Morph/Hyph     |                                                       |                                                                                                                                                       |
| NCU06656 | transcriptional activator protein acu-15 | acu-15 | Transc Factors |                                                       |                                                                                                                                                       |
| NCU06695 | cytochrome c oxidase polypeptide VI      | cox-6  | Morph/Hyph     | Transporter Activity/Catalytic Activity               | Cellular Process/ Metabolic Process                                                                                                                   |
| NCU06714 | para-aminobenzoic acid synthetase        | pab-1  | Morph/Hyph     |                                                       |                                                                                                                                                       |
| NCU06744 | hypothetical protein                     |        | Transc Factors |                                                       |                                                                                                                                                       |
| NCU06764 | 20S proteasome subunit Y7                | pca-2  | Morph/Hyph     | Catalytic Activity                                    | Cellular Process/ Metabolic Process                                                                                                                   |
| NCU06799 | fungal specific transcription factor     | vad-5  | Transc Factors |                                                       |                                                                                                                                                       |
| NCU06845 | short chain dehydrogenase/reductase      |        | Morph/Hyph     |                                                       |                                                                                                                                                       |



|          |                                                     |        |                        |                      |                                                                                                                              |
|----------|-----------------------------------------------------|--------|------------------------|----------------------|------------------------------------------------------------------------------------------------------------------------------|
| NCU06910 | Cell wall integrity and stress response component 1 | wsc-1  | Morph/Hyph             |                      |                                                                                                                              |
| NCU06919 | hypothetical protein                                |        | Tranc Factors          |                      |                                                                                                                              |
| NCU06971 | transcriptional activator xlnR                      | xlr-1  | Tranc Factors          |                      |                                                                                                                              |
| NCU07007 | submerged protoperithecia-2                         | sub-2  | Tranc Factors          |                      |                                                                                                                              |
| NCU07039 | GATA type zinc finger protein Asd4                  | asd-4  | Tranc Factors          |                      |                                                                                                                              |
| NCU07139 | BEAK-2                                              | bek-2  | Tranc Factors          |                      |                                                                                                                              |
| NCU07221 | two-component system protein A                      | hcp-1  | Morph/Hyph             |                      |                                                                                                                              |
| NCU07237 | hypothetical protein                                |        | <i>E. coli</i> CS Orth |                      |                                                                                                                              |
| NCU07281 | glucose-6-phosphate isomerase                       | gpi-1  | <i>E. coli</i> CS Orth | Catalytic Activity   | Metabolic Process                                                                                                            |
| NCU07374 | hypothetical protein                                |        | Tranc Factors          |                      |                                                                                                                              |
| NCU07378 | serine threonine protein kinase                     | stk-12 | Morph/Hyph             | Catalytic Activity   | Biological Regulation/Cellular Component Organization or Biogenesis/Response to Stimulus/ Cellular Process/Metabolic Process |
| NCU07379 | transcription factor-5                              | tcf-5  | Tranc Factors          |                      |                                                                                                                              |
| NCU07392 | transcriptional regulatory protein pro-1            | adv-1  | Tranc Factors          |                      |                                                                                                                              |
| NCU07420 | eIF4A                                               | eif4A  | Morph/Hyph             |                      |                                                                                                                              |
| NCU07535 | SAH-3                                               | sah-3  | Tranc Factors          | Catalytic Activity   | Cellular Process/ Metabolic Process                                                                                          |
| NCU07589 | acetyltransferase                                   |        | Morph/Hyph             |                      |                                                                                                                              |
| NCU07591 | Integral membrane protein                           |        | Morph/Hyph             |                      |                                                                                                                              |
| NCU07605 | hypothetical protein                                |        | Morph/Hyph             |                      |                                                                                                                              |
| NCU07621 | zinc-regulated transporter 1                        | tzn-1  | Morph/Hyph             | Transporter Activity | Cellular Process                                                                                                             |
| NCU07728 | siderophore regulation protein                      | sre    | Tranc Factors          |                      |                                                                                                                              |
| NCU07900 | hypothetical protein                                |        | Tranc Factors          |                      |                                                                                                                              |
| NCU07952 | zinc finger transcription factor-37                 | znf-37 | Tranc Factors          |                      |                                                                                                                              |

|          |                                       |        |                        |                                            |                                                                                                                                             |
|----------|---------------------------------------|--------|------------------------|--------------------------------------------|---------------------------------------------------------------------------------------------------------------------------------------------|
| NCU08049 | hypothetical protein                  |        | Transc Factors         |                                            |                                                                                                                                             |
| NCU08050 | hypothetical protein                  |        | Morph/Hyph             |                                            |                                                                                                                                             |
| NCU08055 | zip-like-1                            | zip-1  | Transc Factors         | Binding                                    | Response to Stimulus/<br>Cellular Process/ Metabolic<br>Process                                                                             |
| NCU08063 | kinetochore protein-18                | kpr-18 | Transc Factors         | Catalytic Activity                         | Cellular Process/ Metabolic<br>Process                                                                                                      |
| NCU08093 | hypothetical protein                  |        | Morph/Hyph             | Transporter<br>Activity/Catalytic Activity | Cellular Component<br>Organization or Biogenesis/<br>Cellular Process/ Metabolic<br>Process                                                 |
| NCU08147 | Na or K P-type ATPase                 | ph7    | Morph/Hyph             | Transporter<br>Activity/Catalytic Activity | Cellular Process/ Metabolic<br>Process                                                                                                      |
| NCU08148 | H+/nucleoside cotransporter           |        | <i>E. coli</i> CS Orth | Transporter Activity                       | Localization Process/<br>Cellular Process                                                                                                   |
| NCU08225 | high affinity nickel transporter nic1 | trm-34 | Morph/Hyph             |                                            |                                                                                                                                             |
| NCU08289 | DNA methylation modulator-2           | dmm-2  | Transc Factors         | Binding                                    |                                                                                                                                             |
| NCU08290 | Ku70/Ku80 family protein              | mus-51 | <i>E. coli</i> CS Orth | Binding                                    | Biological<br>Regulation/Cellular<br>Component Organization or<br>Biogenesis/Response to<br>Stimulus/ Cellular<br>Process/Metabolic Process |
| NCU08443 | hypothetical protein                  |        | Transc Factors         |                                            |                                                                                                                                             |
| NCU08516 | aldose 1-epimerase                    | aep-1  | <i>E. coli</i> CS Orth | Catalytic Activity                         | Metabolic Process                                                                                                                           |
| NCU08634 | hypothetical protein                  |        | Transc Factors         |                                            |                                                                                                                                             |
| NCU08652 | hypothetical protein                  |        | Transc Factors         |                                            |                                                                                                                                             |
| NCU08726 | fluffy                                | fl     | Transc Factors         |                                            |                                                                                                                                             |

|          |                                              |       |               |                                                 |                                                                                                                              |
|----------|----------------------------------------------|-------|---------------|-------------------------------------------------|------------------------------------------------------------------------------------------------------------------------------|
| NCU08741 | Hyphal anastamosis protein 3                 | ham-3 | Morph/Hyph    |                                                 |                                                                                                                              |
| NCU08744 | hypothetical protein                         |       | Tranc Factors |                                                 |                                                                                                                              |
| NCU08791 | catalase-1                                   | cat-1 | Morph/Hyph    | Antioxidant Activity/Binding/Catalytic Activity | Response to Stimulus/ Cellular Process/ Metabolic Process                                                                    |
| NCU08848 | hypothetical protein                         |       | Tranc Factors |                                                 |                                                                                                                              |
| NCU08875 | Cullin binding protein CanA                  |       | Morph/Hyph    |                                                 | Cellular Component Organization or Biogenesis/ Metabolic Process                                                             |
| NCU08891 | hypothetical protein                         |       | Tranc Factors |                                                 | Cellular Process                                                                                                             |
| NCU08899 | hypothetical protein                         |       | Tranc Factors |                                                 |                                                                                                                              |
| NCU08901 | hypothetical protein                         |       | Tranc Factors |                                                 |                                                                                                                              |
| NCU08927 | dihydroceramide delta(4)-desaturase          | dcd   | Morph/Hyph    | Catalytic Activity                              | Cellular Process/ Metabolic Process                                                                                          |
| NCU08992 | hypothetical protein                         |       | Morph/Hyph    | Binding                                         | Cellular Component Organization or Biogenesis/ Cellular Process/ Metabolic Process                                           |
| NCU09033 | zinc finger transcription factor-46          |       | Tranc Factors |                                                 |                                                                                                                              |
| NCU09068 | nitrogen catabolic enzyme regulatory protein | nit-2 | Tranc Factors |                                                 |                                                                                                                              |
| NCU09071 | AGC/NDR protein kinase                       | dbf2  | Morph/Hyph    | Catalytic Activity                              | Biological Regulation/Cellular Component Organization or Biogenesis/Response to Stimulus/ Cellular Process/Metabolic Process |

|          |                                              |        |               |                                                   |                                                                                           |
|----------|----------------------------------------------|--------|---------------|---------------------------------------------------|-------------------------------------------------------------------------------------------|
| NCU09123 | Ca/CaM-dependent kinase-1                    | camk-1 | Morph/Hyph    |                                                   |                                                                                           |
| NCU09201 | hypothetical protein                         |        | Morph/Hyph    |                                                   |                                                                                           |
| NCU09205 | nitrate assimilation regulatory protein nirA | vad-6  | Tranc Factors |                                                   |                                                                                           |
| NCU09248 | transcription factor-27                      | tcf-27 | Tranc Factors |                                                   |                                                                                           |
| NCU09252 | hypothetical protein                         |        | Tranc Factors |                                                   |                                                                                           |
| NCU09315 | phosphorus acquisition-controlling protein   | nuc-1  | Tranc Factors |                                                   |                                                                                           |
| NCU09333 | Zinc finger transcription factor ace-1       | ace-1  | Tranc Factors |                                                   |                                                                                           |
| NCU09364 | Hsp30-like protein                           | hsp30  | Morph/Hyph    |                                                   | Response to Stimulus/<br>Metabolic Process                                                |
| NCU09423 | secreted protein related to phopholipase A2  |        | Morph/Hyph    |                                                   |                                                                                           |
| NCU09450 | 26S proteasome regulatory subunit Rpn2       | rpn-2  | Morph/Hyph    | Catalytic Activity                                | Cellular Process/Metabolic<br>Process                                                     |
| NCU09494 | hypothetical protein                         |        | Morph/Hyph    |                                                   |                                                                                           |
| NCU09529 | hypothetical protein                         |        | Tranc Factors | Binding                                           | Cellular Process/Metabolic<br>Process                                                     |
| NCU09549 | zinc finger transcription factor-51          | znf-51 | Tranc Factors |                                                   |                                                                                           |
| NCU09655 | hypothetical protein                         |        | Morph/Hyph    |                                                   |                                                                                           |
| NCU09739 | all development altered-7                    | fld    | Tranc Factors |                                                   |                                                                                           |
| NCU09804 | zinc finger transcription factor-43          | znf-43 | Tranc Factors |                                                   |                                                                                           |
| NCU09829 | hypothetical protein                         |        | Tranc Factors |                                                   |                                                                                           |
| NCU09842 | mitogen-activated protein kinase MKC1        | mak-1  | Morph/Hyph    | Signal Transducer Activity/<br>Catalytic Activity | Biological Regulation/<br>Response to Stimulus/<br>Cellular Process/ Metabolic<br>Process |
| NCU09866 | thyroid hormone receptor interactor 12       |        | Morph/Hyph    |                                                   |                                                                                           |
| NCU09882 | metacaspase-1A                               | mcp-1  | Morph/Hyph    |                                                   |                                                                                           |
| NCU10006 | hypothetical protein                         |        | Tranc Factors |                                                   |                                                                                           |

1 Figure 1: Conventional growth vs cold shock in wild-type and mutant *Neurospora*:  
2 A) Wild-type (Oak Ridge) *Neurospora* growth at 33°C, B) cold shock response in wild-type *Neurospora*, While many of  
3 the knockout strains tested displayed a morphological response to cold shock indistinguishable from that of wild-type,  
4 alternative morphologies were observed. These were classified into categories, examples of which are shown here.  
5 Examples of the alternate cold shock phenotypes displayed with the identity of the mutant shown as the example are  
6 shown: C) Burst: tips of growing hypha burst commonly (NCU02133, superoxide dismutase-1), D) Fail: a failure to  
7 display any morphological response to cold shock (NCU02636, peroxin-4), E) Thin: hyphal diameter narrows on cold  
8 shock (NCU03013, anchored cell wall protein-10), F) Dense: apical branching tighter than that normally displayed  
9 during cold shock (NCU07617, aconidiate-3), G) Cot-like: phenotype resembles that seen at the restrictive temperature  
10 of a temperature-sensitive colonial (cot) mutant strain. (NCU03901, peroxin-14), H) Weak: apical branching during  
11 cold shock which is less dense than normally observed (NCU01408, COP9 signalosome-3). Combinations of the above  
12 were sometimes observed as noted in Table 1.  
13

1

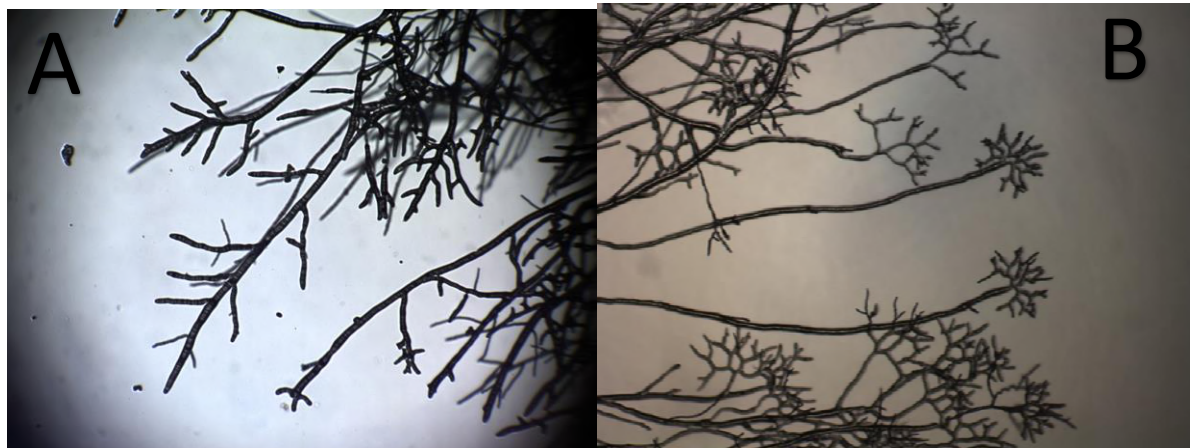

2

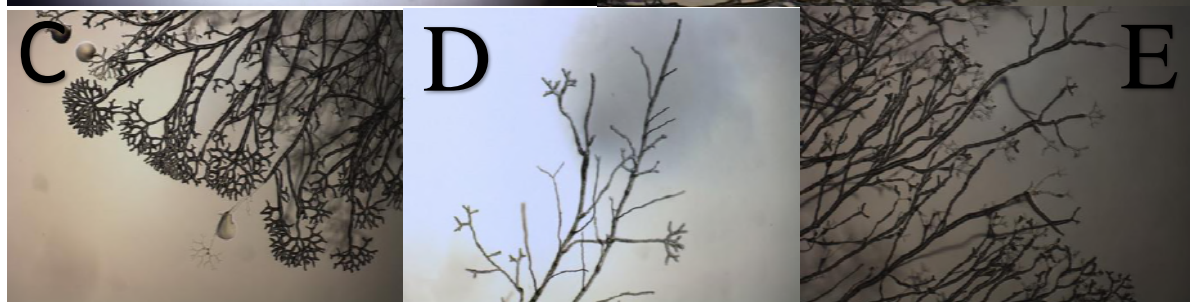

3

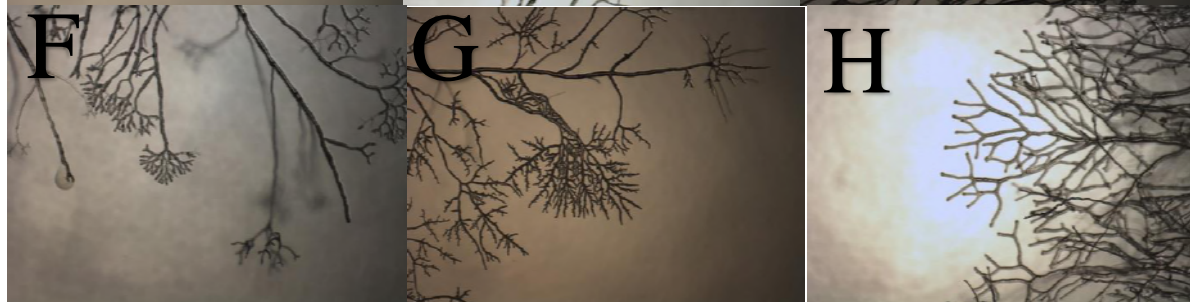

4

5

6

## 1 References:

2

3 Canclini, L. and A. Esteves, 2007 Preliminary analysis of cold stress responsive proteins in *Mesocestoides corti* larvae.  
4 116:314-319.

5 Carrillo, A. J., P. Schacht, I. E. Cabrera, J. Blahut, L. Prudhomme, S. Dietrich, T. Bekman, J. Mei, C. Carrera, V. Chen,  
6 I. Clark, G. Fierro, L. Ganzen, J. Orellana, S. Wise, K. Yang, H. Zhong and K. A. Borkovich. 2017 Functional  
7 Profiling of Transcription Factor Genes in *Neurospora crassa*. G3: GENES, GENOMES, GENETICS Early online  
8 July 10, 2017

9 Colot H. V., G. Park, G. E. Turner, C. Ringelberg, C. Crew, L. Lintvinkova, R. L. Weiss, K. A. Borkovich, J. C. Dunlap,  
10 2006 A high-throughput gene knockout procedure for *Neurospora* reveals functions for multiple transcription  
11 factors. Proc. Natl. Acad. Sci. USA 103:10352–10357.

12 Davis, R.H. & F.J. deSerres, 1970 Genetic and microbiological research techniques for *Neurospora crassa*. Methods in  
13 Enzymology 17:79-143.

14 Fang, W. and R. J. St Leger, 2010 RNA binding proteins mediate the ability of a fungus to adapt to the cold.  
15 Environmental Microbiology 12(3):810-20.

16 Giuliadori, A. M., A. Brandi, C. O. Gualerzi and C. L. Pon, 2004 Preferential translation of cold-shock mRNAs during  
17 cold adaptation. RNA 10:265-276.

18 Gualerzi, C. O., A. M. Giuliadori, A. Brandi, F. Di Pietro, L. Piersimoni, A. Fabbretti and C. L. Pon, 2011 Translation  
19 initiation at the root of the cold-shock translational bias. p. 143-154. In M. V. Rodina, W. Wintermeyer and R. Green  
20 (Ed.) Ribosomes. Springer-Verlag, Vienna.

21 Guy, C., 1999 Molecular Responses of Plants to Cold Shock and Cold Acclimation. Journal of Molecular Microbiology  
22 and Biotechnology 1(2):231-242.

23 McCluskey K., 2003 The fungal genetics stock center: from molds to molecules. Advances in Applied Microbiology  
24 52:245-262.

25 Mi, H. X. Huang, A. Muruganujan, H. Tang, C. Mills, D. Kang, and P. D. Thomas, 2017 PANTHER version 11:  
26 expanded annotation data from Gene Ontology and Reactome pathways, and data analysis tool enhancements.  
27 Nucleic Acids Research, 45:D183–D189.

- 1 Phadtare, S., 2004 Recent Developments in Bacterial Cold-Shock Response. *Current Issues in Molecular Biology*.  
2 6:125-136.
- 3 Phadtare, S. and M. Inouye, 2004 Genome-Wide Transcriptional Analysis of the Cold Shock Response in Wild-Type  
4 and Cold-Sensitive, Quadruple-*csp*-Deletion Strains of *Escherichia coli*. *Journal of Bacteriology* 186:7007-7014.
- 5 Reynaga-Peña, C. G., Bracker, C. E. and S. Bartnicki-Garcia, 1995 Cytoplasmic contractions, Spitzenkörper behavior  
6 and apical branching in *Aspergillus niger*. In: *Ann. Meet. Mycol. Soc. America, San Diego, CA. Inoculum* 46: p. 34.
- 7 Riquelme M. & S. Bartnicki-Garcia, 2004 Key differences between lateral and apical branching in hyphae of  
8 *Neurospora crassa*. *Fungal Genetics and Biology* 41:842-851.
- 9 Seiler, S. & M. Plamann, 2003 The Genetic Basis of Cellular Morphogenesis in the Filamentous Fungus *Neurospora*  
10 *crassa*. 14:4352-4364.
- 11 Shivaji, S. and J. S. S. Prakash, 2010 How do bacteria sense and respond to low temperature. *Archives of Microbiology*  
12 192:85-95.
- 13 Watters, M. K., C. Humphries, I. deVries, and A. J. F. Griffiths, 2000 A homeostatic set point for branching in  
14 *Neurospora crassa*. *Mycological Research* 104:557-563.
- 15 Watters, M. K., M. Boersma, M. Johnson, C. Reyes, E. Westrick & E. Lindamood, 2011 A screen for *Neurospora*  
16 knockout mutants displaying growth rate dependent branch density. *Fungal Biology*. 115: 296-301.
- 17 Watters, M. K., 2013 Control of Branching in *Neurospora crassa*. In *Neurospora Genomics and Molecular Biology*,  
18 Durgadas P. Kasbekar & Kevin McCluskey eds. (Norfolk, U.K., Caister Academic Press), pp. 23 – 44.
- 19
